# Supplementary material for: Tunable Aryl Alkyl Ionic Liquid Supported Synthesis of Platinum Nanoparticles and Their Catalytic Activity in the Hydrogen Evolution Reaction and in Hydrosilylation
Source: MDPI journal article supplement (doi:10.3390/molecules28010405), 2023-01-03
Supplement: s1 [file s1]

# Tunable Aryl Alkyl Ionic Liquid Supported Synthesis of Platinum Nanoparticles and their Catalytic Activity in the Hydrogen Evolution Reaction and in Hydrosilylation

Dennis Woitassek <sup>1,†</sup>, Till Strothmann <sup>1,†</sup>, Harry Biller <sup>2</sup>, Swantje Lerch <sup>2</sup>, Henning Schmitz <sup>1</sup>, Yefan Song <sup>1</sup>, Stefan Roitsch <sup>3</sup>, Thomas Strassner <sup>2,\*</sup> and Christoph Janiak <sup>1,\*</sup>

<sup>1</sup> Institut für Anorganische Chemie und Strukturchemie, Heinrich-Heine-Universität Düsseldorf, 40204 Düsseldorf, Germany

<sup>2</sup> Physikalische Organische Chemie, Technische Universität Dresden, 01062 Dresden, Germany

<sup>3</sup> Institut für Physikalische Chemie, Universität zu Köln, 50939 Köln, Germany

\* Correspondence: thomas.strassner@tu-dresden.de (T.S.); janiak@uni-duesseldorf.de (C.J.); Tel.: +49-2118112286 (C.J.)

† Both authors contributed equally to this work.

---

## Contents

**Section S1** Sources of chemicals

**Section S2** Synthesis and characterization of TAAILs

**Section S3** Synthesis parameters and analyses of platinum-nanoparticles (Pt-NPs) in TAAILs and ethylene glycol (EG)

**Section S4** Additional electrochemical measurements

**Section S5** Hydrosilylation conversion and product analysis

## S1 Sources of chemicals

**Table S1.** Sources for starting materials and solvents.

| Items                                                     | Manufacturer      |
|-----------------------------------------------------------|-------------------|
| n-Butyllithium (1.6 mol L <sup>-1</sup> in hexane)        | Acros organics    |
| Methylolithium (1.6 mol L <sup>-1</sup> in diethyl ether) | Sigma-Aldrich     |
| 1,2-Dibromoethane (>98%)                                  | Fluka             |
| Potassium hexachloridoplatinate(IV) (97 %)                | BLDpharm          |
| Potassium iodide (USP, BP, Ph. Eur. pure, pharma grade)   | PanReac Applichem |
| Methylcyclopentadienyl dimer (95 %)                       | Acros organics    |
| Acetonitrile (≥ 99.9%)                                    | VWR Chemicals     |
| Chloroform-d (99.8 atom % D)                              | Sigma-Aldrich     |
| Phenylacetylene (97%)                                     | Carbolution       |
| Triethylsilane (99%)                                      | Carbolution       |
| Ethylene glycol (99.5%)                                   | Acros organics    |
| Sodium hydroxide (>98.8%)                                 | Chemsolute        |
| Propan-2-ol (≥99.8%)                                      | Fisher chemical   |
| Sulfuric acid (0.5 mol L <sup>-1</sup> in water)          | Chemsolute        |

The TAAILs mentioned in this work have been provided by the working group of Prof. Dr. Strassner. For further characterization and synthesis, see the works of Lerch *et al.* and Biller *et al.* [1,2].

## S2 Synthesis and characterization of TAAILs

### S2.1 Synthesis procedure and characterization

The synthesis of the TAAILs mentioned in this work follow the procedures of Lerch *et al.* [1] and Biller *et al.* [2]. In short, the synthesis of 1-aryl-3-alkylimidazolium bis(trifluoromethylsulfonyl)imide TAAILs was done in two steps, from the alkylation of aryl imidazoles with bromoalkanes to the ion exchange from bromide to bis(trifluoromethylsulfonyl)imide. The 1-aryl-2-aryl-3-alkylimidazolium bis(trifluoromethylsulfonyl)imide TAAILs have been obtained after four steps, from the nucleophile addition to the benzimidamide, second to the ring-closing reaction of the imidazole-backbone, third to the alkylation of aryl imidazoles with bromoalkanes and fourth to the anion exchange to bis(trifluoromethylsulfonyl)imide.

#### N-(4-bromophenyl)benzimidamide

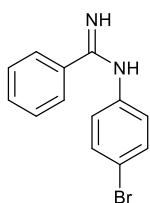

Under an argon atmosphere, sodium hydride (15.0 g, 750 mmol) was dissolved in dry DMSO (200 mL) and cooled externally with an ice bath. 4-Bromoaniline (96.6 g, 550 mmol) and benzonitrile (52.1 g, 500 mmol) were added and the mixture was stirred at 0 °C for 60 minutes and additionally 16 h at room temperature. Ice-water (250 mL) was poured into the mixture under vigorous stirring. The solid was filtered off and washed with *iso*-hexane. The solid was dissolved in an aqueous HCl-solution (1 mol L<sup>-1</sup>) and filtered. The filtrate was adjusted to pH

11 with an aqueous NaOH solution and extracted with dichloromethane. The combined extracts were washed with water twice, dried with MgSO<sub>4</sub> and filtered. After removing the solvent *in vacuo*, the crude product was overlaid with *iso*-hexane and cooled to 0 °C for 16 h. The precipitated product was washed with cold *iso*-hexane and dried under high vacuum to yield N-(4-bromophenyl)benzimidamide as a beige solid (yield 95.1 g, 346 mmol, 69%).

<sup>1</sup>H NMR (300 MHz, CDCl<sub>3</sub>): δ 7.79 (d, *J* = 6.8 Hz, 2H), 7.53 – 7.26 (m, 5H), 6.83 (d, *J* = 8.6 Hz, 2H), 4.95 (s, 2H).

<sup>13</sup>C NMR (75 MHz, CDCl<sub>3</sub>): δ 155.6, 148.5, 135.3, 132.6, 130.9, 128.7, 126.9, 123.7, 116.0.

**Elemental analysis** C<sub>13</sub>H<sub>11</sub>BrN<sub>2</sub>

calc.: C: 56.75%, H: 4.03%, N: 10.18%.

found: C: 56.93%, H: 3.99%, N: 10.03%.

#### 1-(4-bromophenyl)-2-phenyl-1H-imidazole

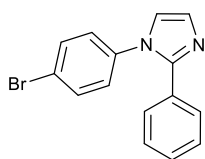

N-(4-bromophenyl)benzimidamide (82.5 g, 30 mmol) and chloroacetaldehyde (56.5 g, 360 mmol, 50 wt% in H<sub>2</sub>O) were dissolved in toluene and stirred at 90 °C for 4 h. An NaOH solution was slowly added until a pH of 8 was reached. The reaction was continued for 4 h under reflux. After the solution had cooled down, the mixture was extracted with aqueous HCl (1 mol L<sup>-1</sup>) twice. The aqueous solution was adjusted with NaOH to pH 8

and extracted with dichloromethane. The organic phase was washed with water and brine and dried with MgSO<sub>4</sub>. The solvent was concentrated *in vacuo* and poured into an excess of *iso*-hexane. The solution was kept at 0 °C until the product precipitated. The precipitated product was washed with cold *iso*-hexane and dried under high vacuum to yield 1-(4-bromophenyl)-2-phenyl-1H-imidazole as a white solid (yield 51.6 g, 173 mmol, 58%).

<sup>1</sup>H NMR (300 MHz, CDCl<sub>3</sub>): δ 7.45 (d, *J* = 8.7 Hz, 2H), 7.36 – 7.28 (m, 2H), 7.25 – 7.16 (m, 4H), 7.06 (d, *J* = 1.3 Hz, 1H), 7.02 (d, *J* = 8.7 Hz, 2H).

<sup>13</sup>C NMR (75 MHz, CDCl<sub>3</sub>): δ 146.7, 137.5, 132.8, 129.7, 129.1, 128.8, 128.8, 128.5, 127.5, 122.7, 122.1.

**Elemental analysis** C<sub>15</sub>H<sub>11</sub>BrN<sub>2</sub>

calc.: C: 60.22%, H: 3.71%, N: 9.36%.

found: C: 59.91%, H: 3.65%, N: 9.33%.

### 1-(4-bromophenyl)-3-butyl-2-phenyl-1H-imidazol-3-ium bromide

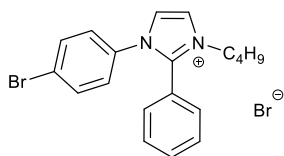

In an Ace pressure tube 1-(4-bromophenyl)-2-phenyl-1H-imidazole (12 g, 40 mmol) and 1-bromooctane (6.15 g, 44 mmol) were dissolved in acetonitrile (10 mL). The reaction was stirred for 48 h at 90 °C. When the reaction was complete, the solvent was evaporated and the residue was dissolved in a small amount of dichloromethane (DCM). The solution was then poured into a large excess of diethyl ether. The precipitate which formed was filtered off and washed with diethyl ether. After drying *in vacuo* the product was obtained as a gray solid (yield 16.2 g, 37.1 mmol, 93%).

<sup>1</sup>H NMR (300 MHz, CDCl<sub>3</sub>): δ 8.07 (d, *J* = 2.1 Hz, 1H), 7.84 (d, *J* = 2.1 Hz, 1H), 7.66 – 7.57 (m, 2H), 7.56 – 7.31 (m, 7H), 4.17 (t, *J* = 7.6 Hz, 2H), 1.78 (quint, *J* = 7.6 Hz, 2H), 1.21 (sext, *J* = 7.6 Hz, 2H), 0.75 (t, *J* = 7.3 Hz, 3H).

<sup>13</sup>C NMR (75 MHz, CDCl<sub>3</sub>): δ 144.33, 133.78, 133.00, 132.44, 131.02, 129.56, 127.85, 124.55, 123.72, 123.18, 121.09, 49.50, 28.28, 21.84, 13.69.

**Elemental analysis** C<sub>19</sub>H<sub>20</sub>Br<sub>2</sub>N<sub>2</sub>

calc.: C: 52.32%, H: 4.62%, N: 6.42%.

found: C: 52.07%, H: 4.51%, N: 6.58%.

### 1-(4-bromophenyl)-3-butyl-2-phenyl-1H-imidazol-3-ium bis(trifluoromethanesulfonyl)imid /[Ph<sub>4</sub>-BrImPhC<sub>4</sub>][NTf<sub>2</sub>]

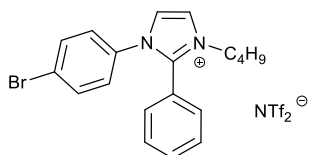

1-(4-Bromophenyl)-3-butyl-2-phenyl-1H-imidazol-3-ium bromide (8.72 g, 20 mmol.) was dissolved in DCM (30 mL). LiNTf<sub>2</sub> (9.02 g, 22 mmol, 70% aq. solution) and additional water (30 mL) was added to the reaction mixture. The two-phase system was stirred at room temperature for 24 h. The organic phase was extracted twice with DCM, washed twice with water and dried over MgSO<sub>4</sub>. The solvent was removed *in vacuo* to yield 1-(4-bromophenyl)-3-butyl-2-phenyl-1H-imidazol-3-ium bis(trifluoromethanesulfonyl)imid (yield 12 g, 18.9 mmol, 94%) as a red liquid.

<sup>1</sup>H NMR (300 MHz, CDCl<sub>3</sub>): δ 7.65 – 7.40 (m, 9H), 7.20 (d, *J* = 8.7 Hz, 2H), 4.12 (t, *J* = 7.7 Hz, 2H), 1.81 (quint, *J* = 7.3 Hz, 2H), 1.29 (sext, *J* = 7.6 Hz, 2H), 0.86 (t, *J* = 7.3 Hz, 3H).

<sup>13</sup>C NMR (75 MHz, CDCl<sub>3</sub>): δ 144.7, 133.7, 133.4, 132.9, 130.6, 130.0, 127.6, 125.0, 123.6, 122.7, 122.1, 120.8, 49.4, 31.8, 19.6, 13.3.

<sup>19</sup>F NMR (282 MHz, CDCl<sub>3</sub>): δ -78.7.

**Elemental analysis** C<sub>21</sub>H<sub>20</sub>BrF<sub>6</sub>N<sub>2</sub>O<sub>4</sub>S<sub>2</sub>

calc.: C: 39.63%, H: 3.17%, N: 6.60%, S: 10.08%.

found: C: 39.56%, H: 2.84%, N: 6.93%, S: 10.28%.

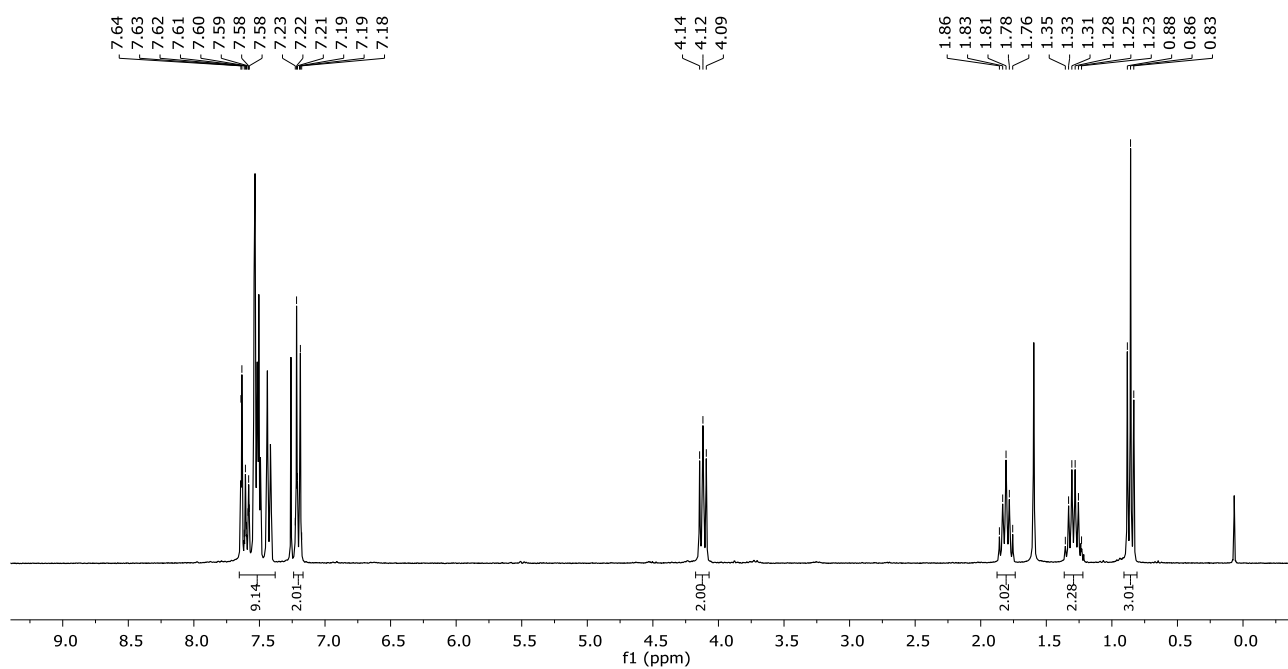

**Figure S1.** <sup>1</sup>H NMR spectrum (300 MHz, CDCl<sub>3</sub>) of [Ph<sub>4</sub>-BrImPhC<sub>4</sub>][NTf<sub>2</sub>].

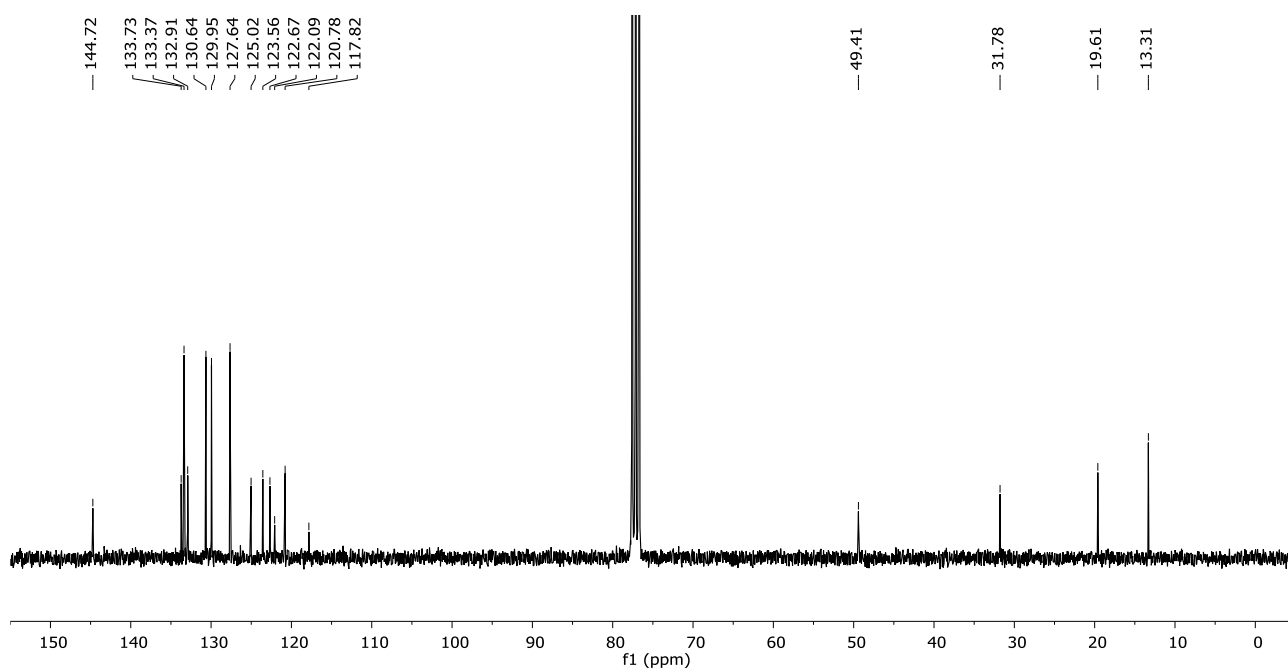

**Figure S2.** <sup>13</sup>C NMR spectrum (CDCl<sub>3</sub>, 75 MHz) of [Ph<sub>4</sub>-BrImPhC<sub>4</sub>][NTf<sub>2</sub>].

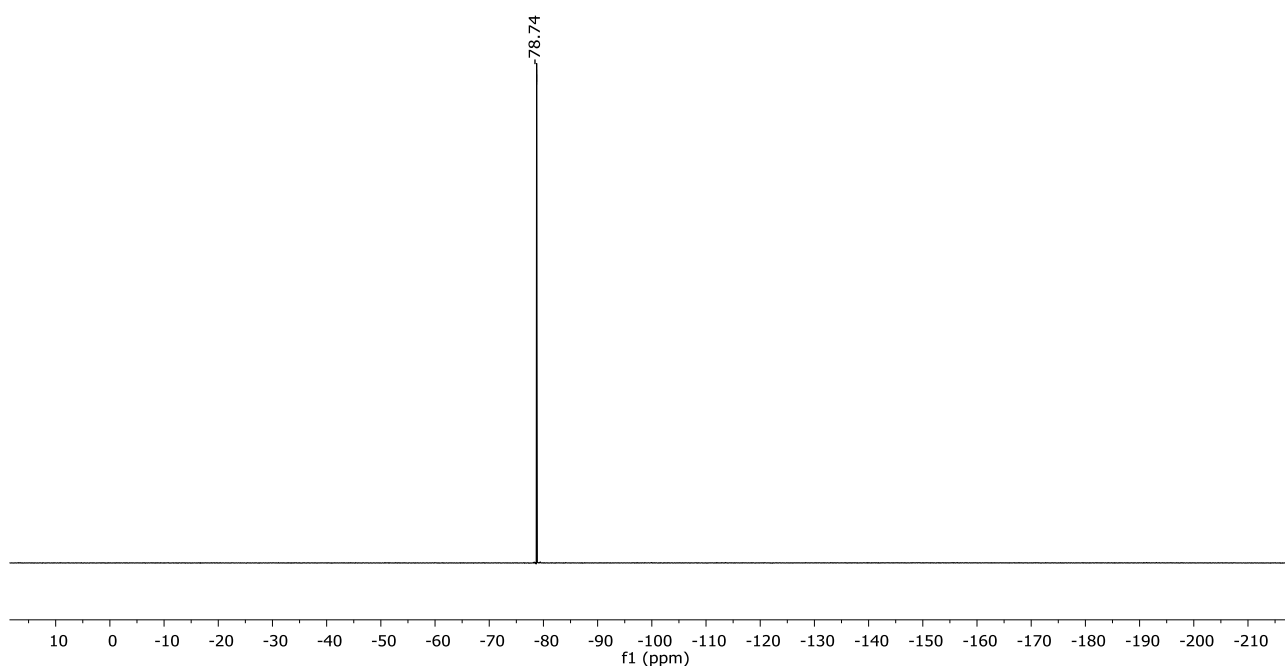

**Figure S3.**  $^{19}\text{F}$  NMR spectrum ( $\text{CDCl}_3$ , 282 MHz) of  $[\text{Ph}_4\text{-BrImPhC}_4][\text{NTf}_2]$ .

## S2.2 Nuclear-magnetic resonance (NMR) spectrometry

### $[\text{Ph}_4\text{-MeImC}_4][\text{NTf}_2]$

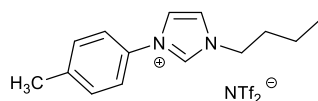

$^1\text{H}$  NMR (300 MHz,  $\text{CDCl}_3$ ):  $\delta$  9.04 (s, 1H), 7.60 (t,  $J = 1.9$  Hz, 1H), 7.53 (t,  $J = 1.9$  Hz, 1H), 7.47 – 7.41 (m, 2H), 7.38 – 7.33 (m, 2H), 4.30 (t,  $J = 7.6$  Hz, 2H), 2.42 (s, 3H), 1.98 – 1.84 (m, 2H), 1.41 (sext,  $J = 7.4$  Hz, 2H), 0.97 (t,  $J = 7.4$  Hz, 3H).

$^{13}\text{C}$  NMR (75 MHz,  $\text{CDCl}_3$ ):  $\delta$  141.3, 134.0, 132.0, 131.2, 123.3, 122.0, 121.8, 119.9 (d,  $J = 321.2$  Hz), 50.5, 32.1, 21.2, 19.5, 13.4.

$^{19}\text{F}$  NMR (282 MHz,  $\text{CDCl}_3$ ):  $\delta$  -78.9.

### $[\text{Ph}_4\text{-OMeImC}_4][\text{NTf}_2]$

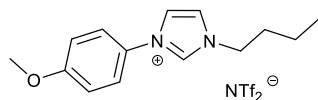

$^1\text{H}$  NMR (300 MHz,  $\text{CDCl}_3$ ):  $\delta$  9.01 (s, 1H), 7.57 – 7.44 (m, 4H), 7.10 – 7.01 (m, 2H), 4.30 (t,  $J = 7.5$  Hz, 2H), 3.86 (s, 3H), 1.99 – 1.83 (m, 2H), 1.49 – 1.33 (m, 2H), 0.98 (t,  $J = 7.4$  Hz, 3H).

$^{13}\text{C}$  NMR (75 MHz,  $\text{CDCl}_3$ ):  $\delta$  161.3, 134.2, 127.3, 123.9, 123.0, 122.0, 119.9 (d,  $J = 321.2$  Hz), 115.7, 55.9, 50.5, 32.1, 19.6, 13.4.

$^{19}\text{F}$  NMR (282 MHz,  $\text{CDCl}_3$ ):  $\delta$  -78.9.

**[Ph<sub>4</sub>-BrImC<sub>4</sub>][NTf<sub>2</sub>]**

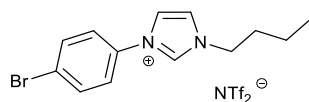

<sup>1</sup>H NMR (300 MHz, CDCl<sub>3</sub>): δ 9.09 (s, 1H), 7.73 – 7.64 (m, 3H), 7.56 – 7.44 (m, 3H), 7.20 (d, *J* = 8.7 Hz, 2H), 4.29 (t, *J* = 7.6 Hz, 2H), 1.98 – 1.85 (m, 2H), 1.41 (sext, *J* = 7.4 Hz, 2H), 0.97 (t, *J* = 7.4 Hz, 3H).

<sup>13</sup>C NMR (75 MHz, CDCl<sub>3</sub>): δ 134.2, 133.9, 133.4, 124.9, 123.9, 123.6, 121.8, 119.9 (d, *J* = 321.2 Hz), 50.7, 32.0, 19.5, 13.4.

<sup>19</sup>F NMR (282 MHz, CDCl<sub>3</sub>): δ -78.9.

**[Ph<sub>4</sub>-BrImC<sub>5</sub>][NTf<sub>2</sub>]**

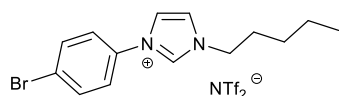

<sup>1</sup>H NMR (300 MHz, CDCl<sub>3</sub>): δ 9.16 (s, 1H), 7.74 – 7.62 (m, 3H), 7.54 – 7.47 (m, 3H), 4.30 (t, *J* = 7.6 Hz, 2H), 1.94 (quint, *J* = 7.5 Hz, 2H), 1.40 – 1.32 (m, 4H), 0.94 – 0.87 (m, 3H).

<sup>13</sup>C NMR (75 MHz, CDCl<sub>3</sub>): δ 134.4, 133.9, 133.4, 125.0, 123.9, 123.4, 121.7, 119.9 (d, *J* = 321.2 Hz), 51.0, 29.8, 28.3, 22.1, 13.8.

<sup>19</sup>F NMR (282 MHz, CDCl<sub>3</sub>): δ -78.9.

**[Ph<sub>2,4-F</sub>ImC<sub>4</sub>][NTf<sub>2</sub>]**

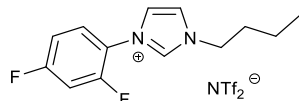

<sup>1</sup>H NMR (300 MHz, CDCl<sub>3</sub>): δ 9.04 (s, 1H), 7.77 – 7.66 (m, 1H), 7.58 – 7.52 (m, 2H), 7.18 – 7.05 (m, 2H), 4.33 (t, *J* = 7.6 Hz, 2H), 2.01 – 1.88 (m, 2H), 1.42 (dq, *J* = 14.7 Hz, 7.4 Hz, 2H), 0.99 (t, *J* = 7.3 Hz, 3H).

<sup>13</sup>C NMR (75 MHz, CDCl<sub>3</sub>): δ 163.9 (dd, *J* = 256.2 Hz, 11.1 Hz), 155.6 (dd, *J* = 255.9 Hz, 12.6 Hz), 136.2, 127.8 (d, *J* = 10.4 Hz), 123.7, 123.0, 119.8 (d, *J* = 321.2 Hz), 118.9 (dd, *J* = 11.6 Hz, 4.2 Hz), 113.6 (dd, *J* = 23.1 Hz, 3.9 Hz), 106.1 (dd, *J* = 27.1 Hz, 22.7 Hz), 50.8, 31.9, 19.5, 13.4.

<sup>19</sup>F NMR (282 MHz, CDCl<sub>3</sub>): δ -79.0, -103.0 (d, *J* = 8.7 Hz), -119.4 (d, *J* = 8.7 Hz).

**[PhImPhC<sub>4</sub>][NTf<sub>2</sub>]**

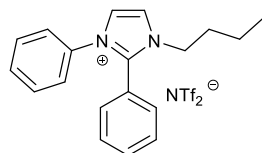

<sup>1</sup>H NMR (300 MHz, CDCl<sub>3</sub>): δ 7.67 (d, *J* = 2.2 Hz, 1H), 7.61 – 7.34 (m, 9H), 7.31 – 7.25 (m, 2H), 4.14 (t, *J* = 7.6 Hz, 2H), 1.81 (quint, *J* = 7.6 Hz, 2H), 1.29 (sext, *J* = 7.1 Hz, 2H), 0.86 (t, *J* = 7.3 Hz, 3H).

<sup>13</sup>C NMR (75 MHz, CDCl<sub>3</sub>): δ 144.6, 132.7, 130.6, 130.2, 129.8, 126.0, 123.6, 122.6, 121.0, 120.0 (d, *J* = 321.6 Hz), 49.3, 31.8, 19.6, 13.3.

<sup>19</sup>F NMR (282 MHz, CDCl<sub>3</sub>): δ -78.8.

**[Ph<sub>2</sub>-MeImPhC<sub>4</sub>][NTf<sub>2</sub>]**

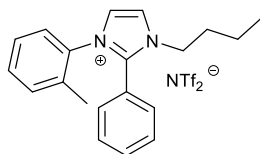

<sup>1</sup>H NMR (300 MHz, CDCl<sub>3</sub>): δ 7.76 (d, *J* = 2.1 Hz, 1H), 7.59 – 7.21 (m, 10H), 4.20 (t, *J* = 7.6 Hz, 2H), 2.05 (s, 3H), 1.84 (quint, *J* = 7.6 Hz, 2H), 1.30 (dq, *J* = 14.5 Hz, 7.3 Hz, 2H), 0.87 (t, *J* = 7.3 Hz, 3H).

<sup>13</sup>C NMR (75 MHz, CDCl<sub>3</sub>): δ 145.1, 134.2, 133.6, 132.8, 131.7, 131.3, 130.2, 129.8, 127.9, 127.8, 123.7, 122.9, 120.9, 120.0 (d, *J* = 321.5 Hz), 49.5, 31.9, 19.6, 17.4, 13.4.

<sup>19</sup>F NMR (282 MHz, CDCl<sub>3</sub>): δ -78.8.

**[Ph<sub>4</sub>-OMeImPhC<sub>4</sub>][NTf<sub>2</sub>]**

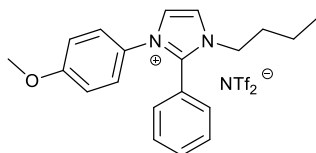

<sup>1</sup>H NMR (300 MHz, CDCl<sub>3</sub>): δ 7.64 – 7.38 (m, 7H), 7.23 – 7.16 (m, 2H), 6.89 – 6.82 (m, 2H), 4.11 (t, *J* = 7.6 Hz, 2H), 3.77 (s, 3H), 1.80 (quint, *J* = 7.6 Hz, 2H), 1.29 (sext, *J* = 7.3 Hz, 2H), 0.85 (t, *J* = 7.3 Hz, 3H).

<sup>13</sup>C NMR (75 MHz, CDCl<sub>3</sub>): δ 160.9, 144.7, 132.6, 130.6, 129.8, 127.3, 127.3, 123.8, 122.3, 121.1, 120.0 (d, *J* = 321.7 Hz), 115.2, 55.7, 49.5, 31.9, 19.6, 13.3.

<sup>19</sup>F NMR (282 MHz, CDCl<sub>3</sub>): δ -78.7.

**[Ph<sub>4</sub>-BrImPhC<sub>4</sub>][NTf<sub>2</sub>]**

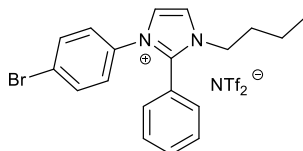

Peak-positions are found in the section 2.1 above.



### S2.3 Ion chromatography (IC)

Calculated with Equation S1 and S2, the TAAIL purity is assessed as the average IC-determined triflimide concentration ( $[\text{NTf}_2]^{-\text{exp}}$  in mg/L, averaged from a double determination of two samples; thus four measurements) relative to the theoretical concentration ( $[\text{NTf}_2]^{-\text{theo}}$  in  $\text{mg L}^{-1}$ ) based on the sample preparation by dissolving a defined mass of IL ( $m_{\text{exp}}(\text{IL})$ ) in 100 mL of eluent (V).  $M(\text{anion})$  and  $M(\text{IL})$  are the molar mass of the  $[\text{NTf}_2]^{-}$ -anion and IL, respectively.

$$[\text{NTf}_2]^{-\text{theo}} = m_{\text{exp}}(\text{IL}) \times M(\text{anion}) / M(\text{IL}) / V \quad (\text{Eq. S1})$$

$$\text{IL purity } [\%] = [\text{NTf}_2]^{-\text{exp}} / [\text{NTf}_2]^{-\text{theo}} \times 100\% \quad (\text{Eq. S2})$$

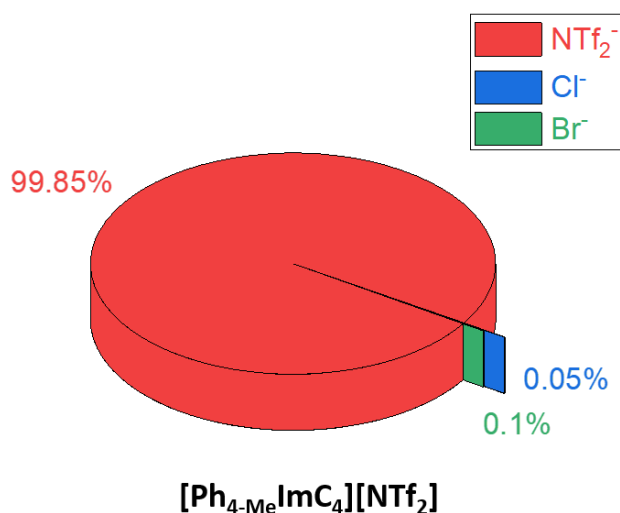

**Figure S4.** Anion weight-percentages obtained by IC of  $[\text{Ph}_{4-\text{Me}}\text{ImC}_4][\text{NTf}_2]$ .

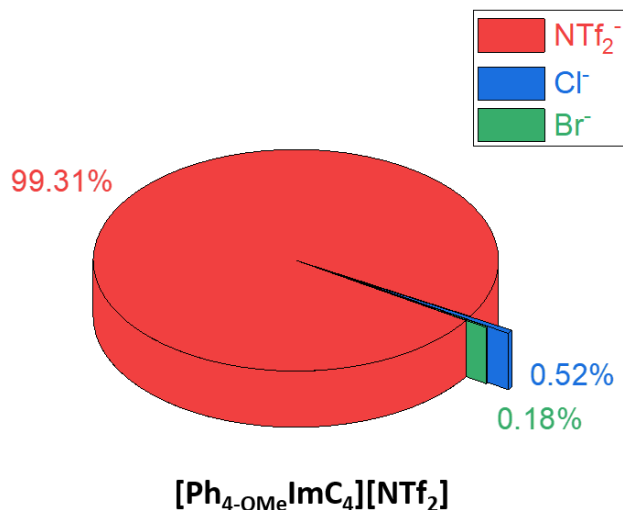

**Figure S5.** Anion weight-percentages obtained by IC measurements of  $[\text{Ph}_{4-\text{OMe}}\text{ImC}_4][\text{NTf}_2]$ .

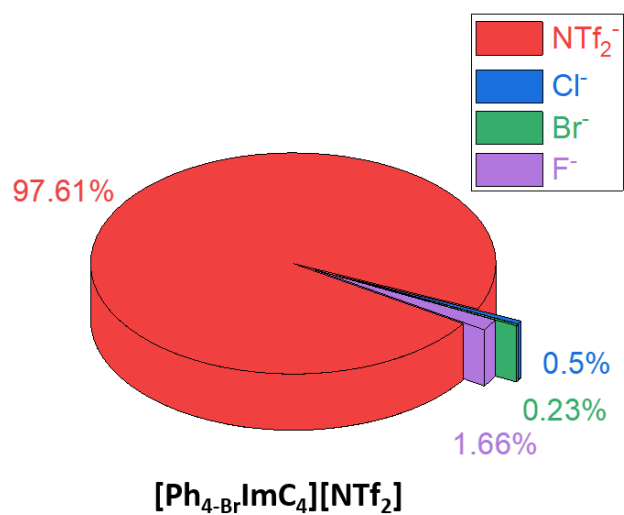

**Figure S6.** Anion weight-percentages obtained by IC measurements of  $[\text{Ph}_{4\text{-Br}}\text{ImC}_4][\text{NTf}_2]$ .

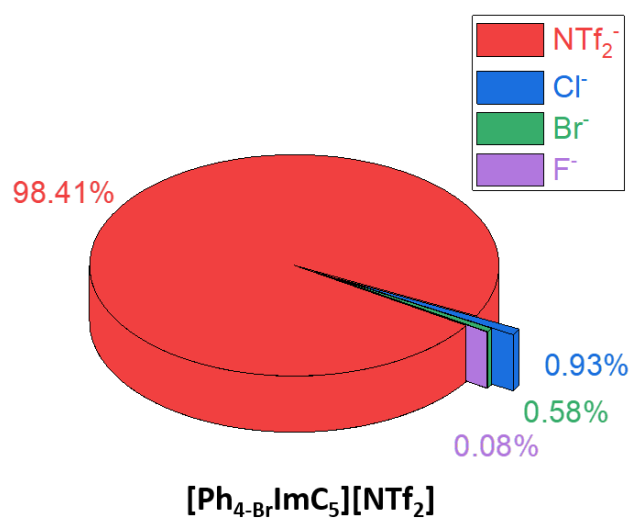

**Figure S7.** Anion weight-percentages obtained by IC measurements of  $[\text{Ph}_{4\text{-Br}}\text{ImC}_5][\text{NTf}_2]$ .

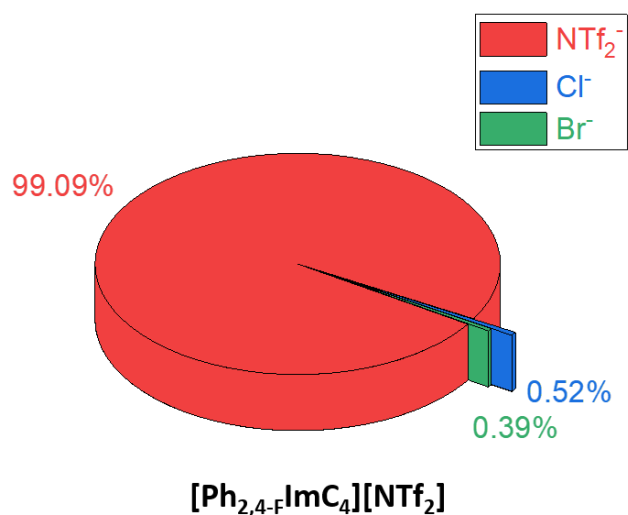

**Figure S8.** Anion weight-percentages obtained by IC measurements of  $[\text{Ph}_{2,4\text{-F}}\text{ImC}_4][\text{NTf}_2]$ .

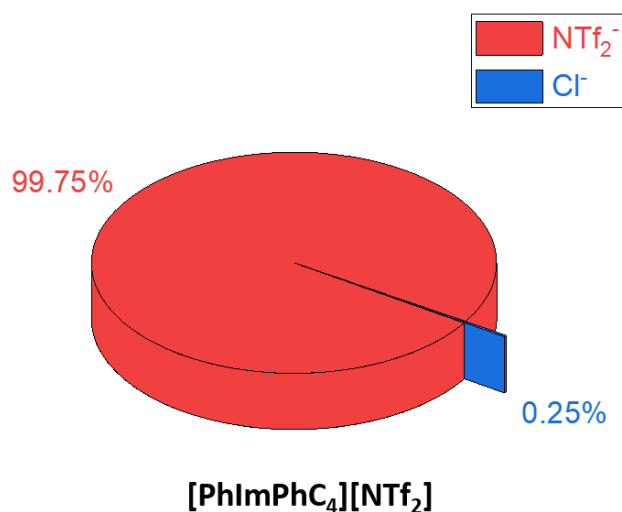

**Figure S9** Anion weight-percentages obtained by IC measurements of [PhImPhC<sub>4</sub>][NTf<sub>2</sub>].

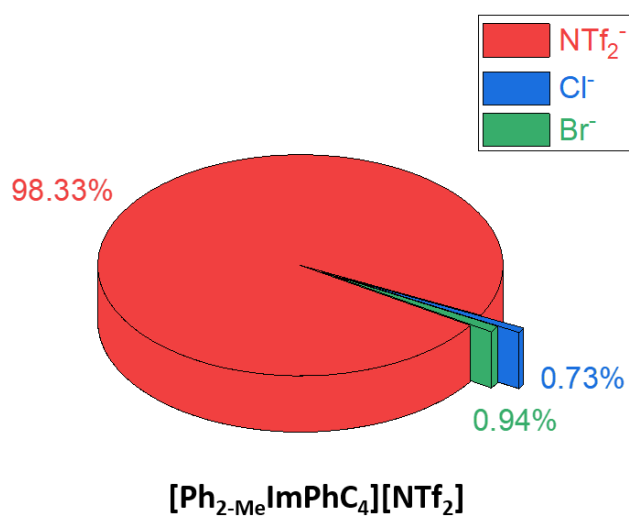

**Figure S10.** Anion weight-percentages obtained by IC measurements of [Ph<sub>2-Me</sub>ImPhC<sub>4</sub>][NTf<sub>2</sub>].

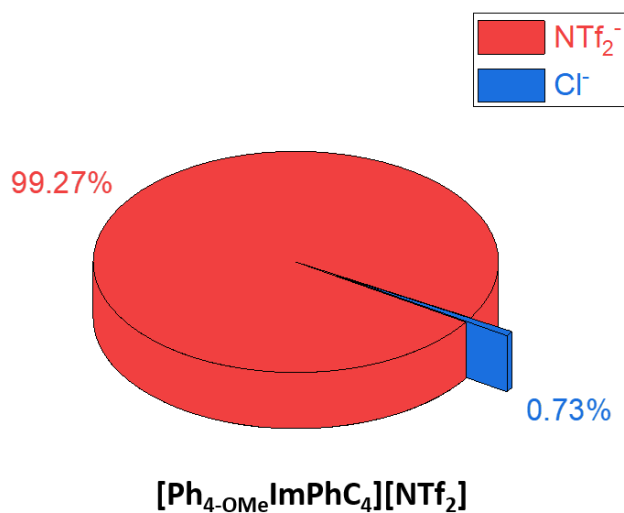

**Figure S11.** Anion weight-percentages obtained by IC measurements of [Ph<sub>4-OMe</sub>ImPhC<sub>4</sub>][NTf<sub>2</sub>].

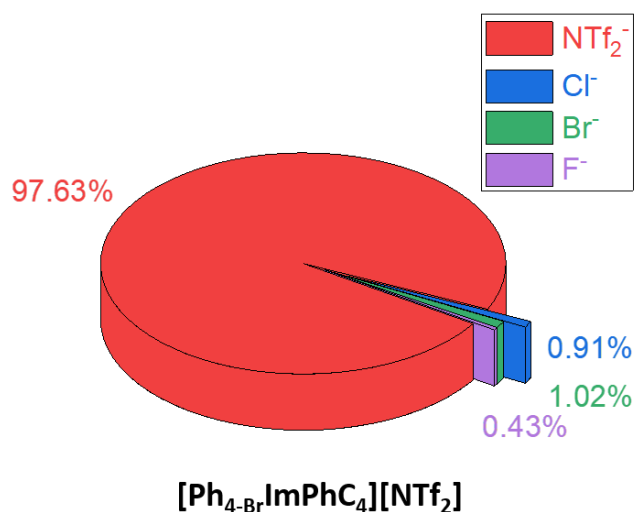

**Figure S12.** Anion weight-percentages obtained by IC measurements of [Ph<sub>4</sub>-BrImPhC<sub>4</sub>][NTf<sub>2</sub>].

**Table S2.** Summary of the TAAIL anion composition in weight percentages (wt%) from IC.

| TAAIL                                                        | NTf <sub>2</sub> <sup>-</sup> (wt%) | Cl <sup>-</sup> (wt%) | Br <sup>-</sup> (wt%) | F <sup>-</sup> (wt%) |
|--------------------------------------------------------------|-------------------------------------|-----------------------|-----------------------|----------------------|
| [Ph <sub>4</sub> -MeImC <sub>4</sub> ][NTf <sub>2</sub> ]    | 99.85                               | 0.05                  | 0.10                  | -                    |
| [Ph <sub>4</sub> -OMeImC <sub>4</sub> ][NTf <sub>2</sub> ]   | 99.31                               | 0.52                  | 0.18                  | -                    |
| [Ph <sub>4</sub> -BrImC <sub>4</sub> ][NTf <sub>2</sub> ]    | 97.61                               | 0.50                  | 0.23                  | 1.66                 |
| [Ph <sub>4</sub> -BrImC <sub>5</sub> ][NTf <sub>2</sub> ]    | 98.41                               | 0.93                  | 0.58                  | 0.08                 |
| [Ph <sub>2</sub> ,4-FImC <sub>4</sub> ][NTf <sub>2</sub> ]   | 99.09                               | 0.52                  | 0.39                  | -                    |
| [PhImPhC <sub>4</sub> ][NTf <sub>2</sub> ]                   | 99.75                               | 0.25                  | -                     | -                    |
| [Ph <sub>2</sub> -MeImPhC <sub>4</sub> ][NTf <sub>2</sub> ]  | 98.33                               | 0.73                  | 0.94                  | -                    |
| [Ph <sub>4</sub> -OMeImPhC <sub>4</sub> ][NTf <sub>2</sub> ] | 99.27                               | 0.73                  | -                     | -                    |
| [Ph <sub>4</sub> -BrImPhC <sub>4</sub> ][NTf <sub>2</sub> ]  | 97.63                               | 0.91                  | 1.02                  | 0.43                 |

## S2.4 Thermogravimetric analysis (TGA)

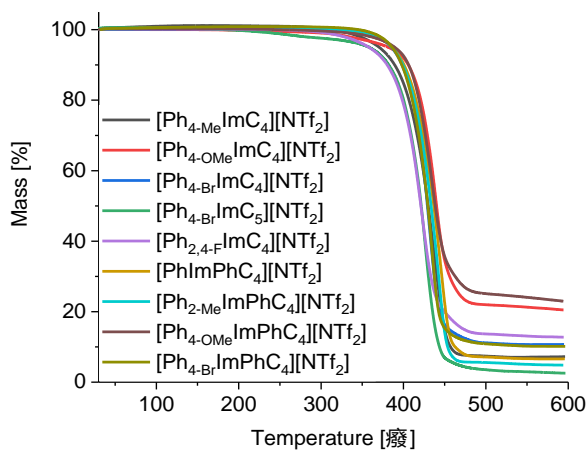

**Figure S13.** TGA curves of ILs between 30-600 °C at 5 K min<sup>-1</sup> in N<sub>2</sub> atmosphere.

### S3 Synthesis parameters and analyses of platinum-nanoparticles (Pt-NPs) in TAAILs and ethylene glycol (EG)

#### S3.1 Analyses overview

**Table S3.** Pt-NPs synthesized in TAAILs ((TAAIL)Pt-NPs) with the corresponding wt% Pt, crystallite size and particle size.

| Sample name | TAAIL                                                        | Pt wt% <sup>1</sup> | Average crystallite size <sup>2</sup> (nm) | Average particle size <sup>3</sup> (nm) |
|-------------|--------------------------------------------------------------|---------------------|--------------------------------------------|-----------------------------------------|
| pMP4        | [Ph <sub>4</sub> -MeImC <sub>4</sub> ][NTf <sub>2</sub> ]    | 2                   | 4                                          | 3.1 ± 0.6                               |
| MOP4        | [Ph <sub>4</sub> -OMeImC <sub>4</sub> ][NTf <sub>2</sub> ]   | 2                   | 3                                          | 1.8 ± 0.3                               |
| BP4         | [Ph <sub>4</sub> -BrImC <sub>4</sub> ][NTf <sub>2</sub> ]    | 2                   | 4                                          | 3.2 ± 0.5                               |
| BP5         | [Ph <sub>4</sub> -BrImC <sub>5</sub> ][NTf <sub>2</sub> ]    | 2                   | 5                                          | 3.3 ± 0.6                               |
| DFP4        | [Ph <sub>2,4</sub> -FImC <sub>4</sub> ][NTf <sub>2</sub> ]   | 2                   | 3                                          | 2.2 ± 0.6                               |
| PP4-1wt     | [PhImPhC <sub>4</sub> ][NTf <sub>2</sub> ]                   | 1                   | 3                                          | /                                       |
| PP4         | [PhImPhC <sub>4</sub> ][NTf <sub>2</sub> ]                   | 2                   | 3                                          | 2.3 ± 0.4                               |
| MPP4-1wt    | [Ph <sub>2</sub> -MeImPhC <sub>4</sub> ][NTf <sub>2</sub> ]  | 1                   | 3                                          | /                                       |
| MPP4        | [Ph <sub>2</sub> -MeImPhC <sub>4</sub> ][NTf <sub>2</sub> ]  | 2                   | 3                                          | 2.4 ± 0.4                               |
| MOPP4-1wt   | [Ph <sub>4</sub> -OMeImPhC <sub>4</sub> ][NTf <sub>2</sub> ] | 1                   | 3                                          | /                                       |
| MOPP4       | [Ph <sub>4</sub> -OMeImPhC <sub>4</sub> ][NTf <sub>2</sub> ] | 2                   | 3 ± 1                                      | 2.9 ± 0.4                               |
| BPP4-1wt    | [Ph <sub>4</sub> -BrImPhC <sub>4</sub> ][NTf <sub>2</sub> ]  | 1                   | 4                                          | /                                       |
| BPP4        | [Ph <sub>4</sub> -BrImPhC <sub>4</sub> ][NTf <sub>2</sub> ]  | 2                   | 4                                          | 5.0 ± 1.0                               |

<sup>1</sup> Pt-NPs were also synthesized with 1 wt% Pt in TAAIL dispersion for comparison. <sup>2</sup> Average crystallite size and standard deviation were determined by applying the Scherrer equation (1) to the strongest reflexes ((111), (200), (220), (311)) observed in the powder X-ray diffraction (PXRD) pattern:

$$L = K \times \lambda / (\Delta(2\theta) \times \cos \theta) \quad (\text{Eq. S3})$$

with  $L$  as average crystallite size,  $K$  as dimensionless shape factor (here 1),  $\lambda$  as wavelength (in nm),  $\Delta(2\theta)$  as full width at half maximum (FWHM) in radians and  $\theta$  as Bragg angle (in °). <sup>3</sup> Determined from at least 200 counted particles in TEM images.

**Table S4.** Crystallite size and particle size of Pt-NP synthesized in mixtures of ethylene glycol (EG) and TAAILs ((EG/TAAIL)Pt-NPs) with 1 wt% Pt.<sup>1</sup>

| Sample name <sup>1</sup> | Utilized TAAIL                                               | EG:IL-Ratio | Average crystallite size <sup>2</sup> (nm) | Average particle size <sup>3</sup> (nm) |
|--------------------------|--------------------------------------------------------------|-------------|--------------------------------------------|-----------------------------------------|
| EG-M4                    | [BMIm][NTf <sub>2</sub> ]                                    | 9/1         | 2                                          | /                                       |
| EG-M4-25%                | [BMIm][NTf <sub>2</sub> ]                                    | 3/1         | 3                                          | /                                       |
| EG-M4-50%                | [BMIm][NTf <sub>2</sub> ]                                    | 1/1         | 4                                          | /                                       |
| EG-M4-75%                | [BMIm][NTf <sub>2</sub> ]                                    | 1/3         | 7                                          | /                                       |
| EG-pMP4                  | [Ph <sub>4</sub> -MeImC <sub>4</sub> ][NTf <sub>2</sub> ]    | 9/1         | 2                                          | 1.7 ± 0.3                               |
| EG-MOP4                  | [Ph <sub>4</sub> -OMeImC <sub>4</sub> ][NTf <sub>2</sub> ]   | 9/1         | 4                                          | 1.8 ± 0.5                               |
| EG-MOP4-50%              | [Ph <sub>4</sub> -OMeImC <sub>4</sub> ][NTf <sub>2</sub> ]   | 1/1         | 8                                          | /                                       |
| EG-MOP4-75%              | [Ph <sub>4</sub> -OMeImC <sub>4</sub> ][NTf <sub>2</sub> ]   | 1/3         | 12                                         | /                                       |
| EG-BP4                   | [Ph <sub>4</sub> -BrImC <sub>4</sub> ][NTf <sub>2</sub> ]    | 9/1         | 2                                          | 1.8 ± 0.3                               |
| EG-BP5                   | [Ph <sub>4</sub> -BrImC <sub>5</sub> ][NTf <sub>2</sub> ]    | 9/1         | 3                                          | 2.2 ± 0.4                               |
| EG-DFP4                  | [Ph <sub>2,4</sub> -FImC <sub>4</sub> ][NTf <sub>2</sub> ]   | 9/1         | 3                                          | 2.3 ± 0.4                               |
| EG-PP4                   | [PhImPhC <sub>4</sub> ][NTf <sub>2</sub> ]                   | 9/1         | 5                                          | 2.0 ± 0.5                               |
| EG-MPP4                  | [Ph <sub>2</sub> -MeImPhC <sub>4</sub> ][NTf <sub>2</sub> ]  | 9/1         | 3                                          | /                                       |
| EG-MOPP4                 | [Ph <sub>4</sub> -OMeImPhC <sub>4</sub> ][NTf <sub>2</sub> ] | 9/1         | 2                                          | 3.2 ± 0.6                               |
| EG-MOPP4-50%             | [Ph <sub>4</sub> -OMeImPhC <sub>4</sub> ][NTf <sub>2</sub> ] | 1/1         | 3                                          | /                                       |
| EG-MOPP4-75%             | [Ph <sub>4</sub> -OMeImPhC <sub>4</sub> ][NTf <sub>2</sub> ] | 1/3         | 6                                          | /                                       |

|             |                                                             |     |   |           |
|-------------|-------------------------------------------------------------|-----|---|-----------|
| EG-BPP4     | [Ph <sub>4</sub> -BrImPhC <sub>4</sub> ][NTf <sub>2</sub> ] | 9/1 | 2 | 2.2 ± 0.6 |
| EG-BPP4-50% | [Ph <sub>4</sub> -BrImPhC <sub>4</sub> ][NTf <sub>2</sub> ] | 1/1 | 3 | /         |
| EG-BPP4-75% | [Ph <sub>4</sub> -BrImPhC <sub>4</sub> ][NTf <sub>2</sub> ] | 1/3 | 3 | /         |

<sup>1</sup> Pt-NPs were prepared as shown in the main text. In addition, Pt-NP were synthesized with 25 wt%, 50 wt% and 75 wt% of TAAIL in EG. <sup>2</sup> Average crystallite size and standard deviation are determined by applying the Scherrer equation (Eq. S3) to the strongest reflexes ((111), (200), (220), (311)) observed in the PXRD pattern. <sup>3</sup> Determined from at least 200 counted particles in TEM images.

### S3.2 Powder X-ray diffractometry (PXRD)

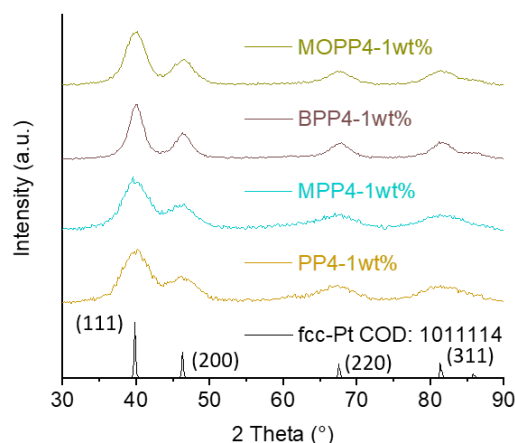

**Figure S14.** PXRD patterns of (TAAIL)Pt-NPs with 1 wt% Pt in IL. The Pt metal reflections (111), (200), (220) and (311) match to the simulation for fcc-Pt and its indexed reflections (Crystallographic open database fcc-Pt: 1011114). Samples synthesized with 1 wt% Pt in IL do not show differences in crystallinity compared to samples with 2 wt% Pt in IL and are thus not further analysed. PXRD patterns of Pt-NP obtained in 2 wt% Pt in IL are presented in the main text.

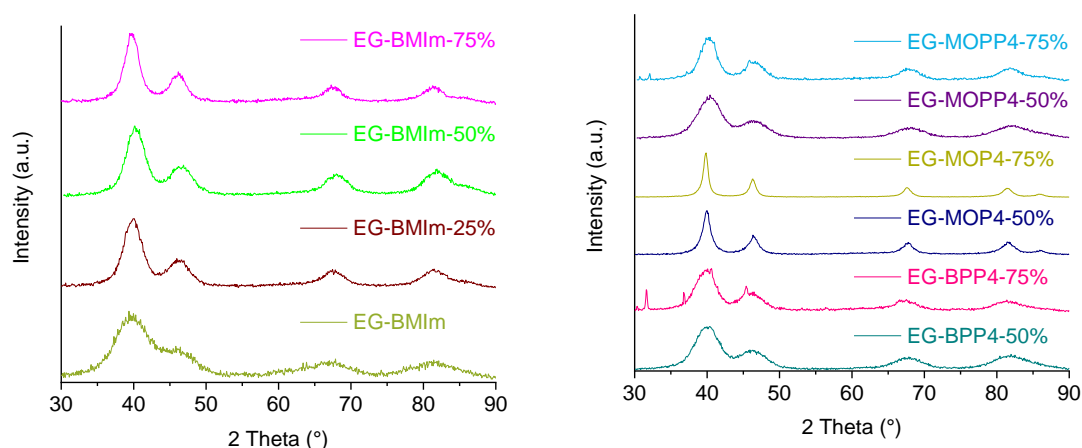

**Figure S15.** PXRD patterns of (EG/TAAIL)Pt-NP with various EG-IL ratios. The Pt metal reflections (111), (200), (220) and (311) match to the simulation for fcc-Pt and its indexed reflections (Crystallographic open database fcc-Pt: 1011114, cf. simulation, shown in Figure 1 in the main text). With higher amounts of IL the crystallite size increases and are not further analysed.

### S3.3 Transmission electron microscopy (TEM)

#### Images of (TAAIL)Pt-NPs

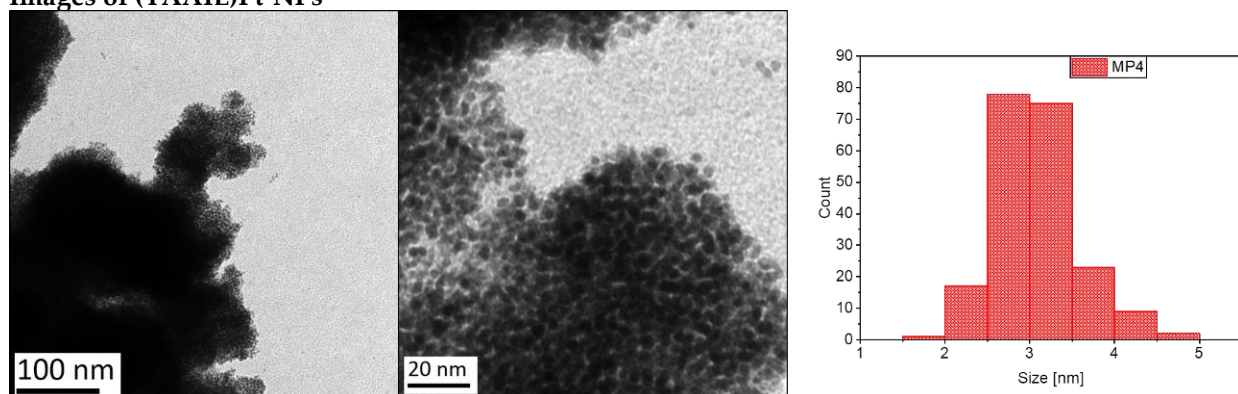

**Figure S16.** TEM-images and particle-size histogram of sample pMP4. At least 200 particles were analyzed.

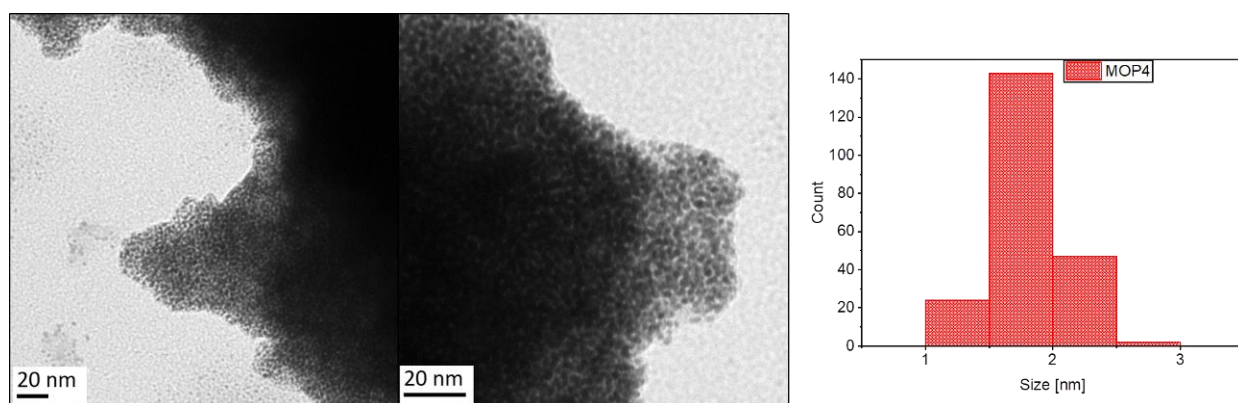

**Figure S17.** TEM-images and particle-size histogram of sample MOP4. At least 200 particles were analyzed.

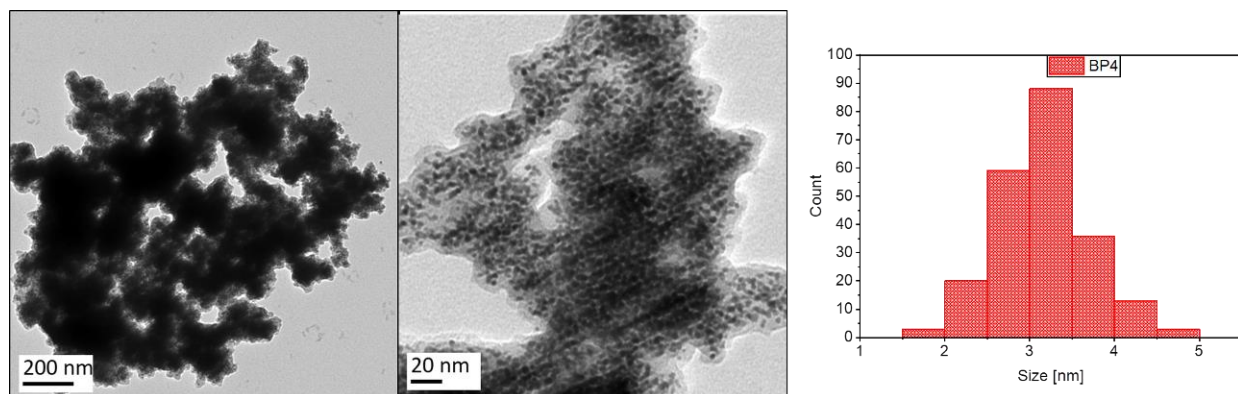

**Figure S18.** TEM-images and particle-size histogram of sample BP4. At least 200 particles were analyzed.

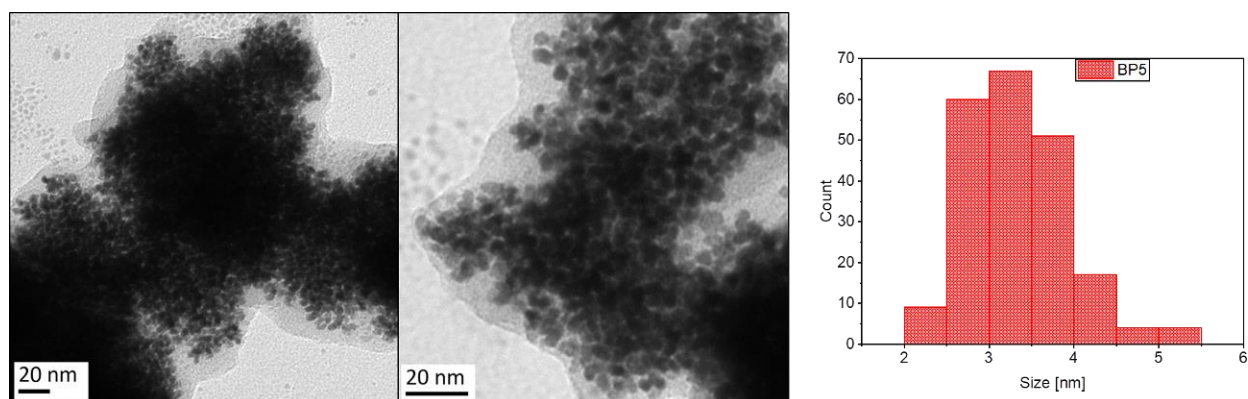

**Figure S19.** TEM-images and particle-size histogram of sample BP5. At least 200 particles were analyzed.



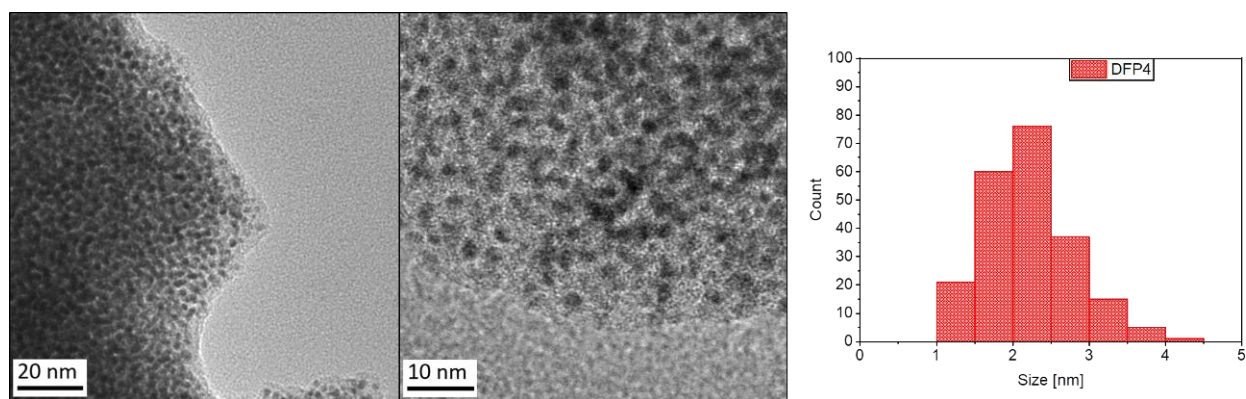

**Figure S20.** TEM-images and particle-size histogram of sample DFP4. At least 200 particles were analyzed.

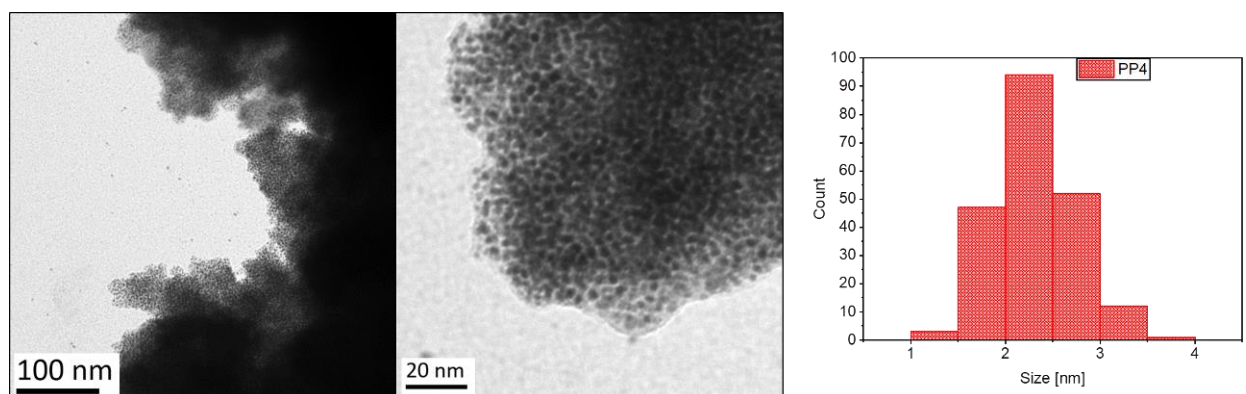

**Figure S21.** TEM-images and particle-size histogram of sample PP4. At least 200 particles were analyzed.

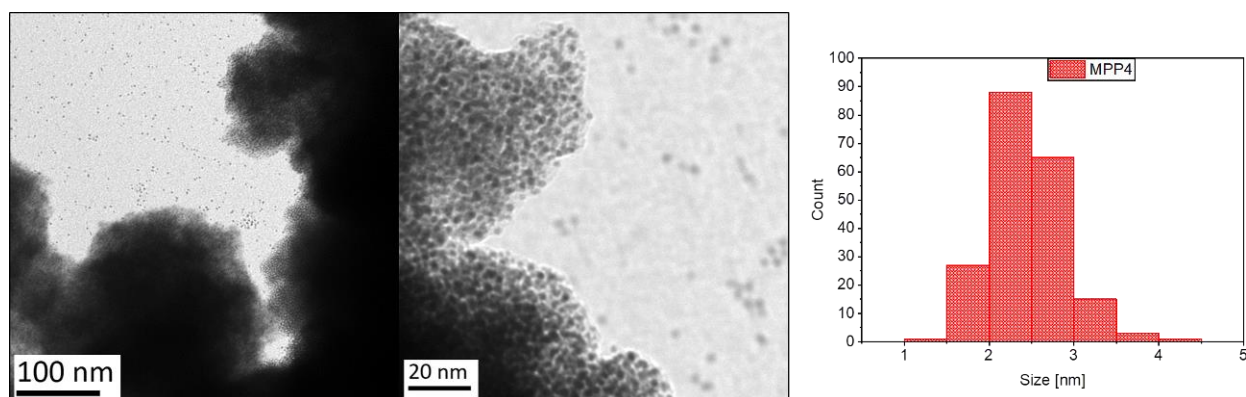

**Figure S22.** TEM-images and particle-size histogram of sample MPP4. At least 200 particles were analyzed.

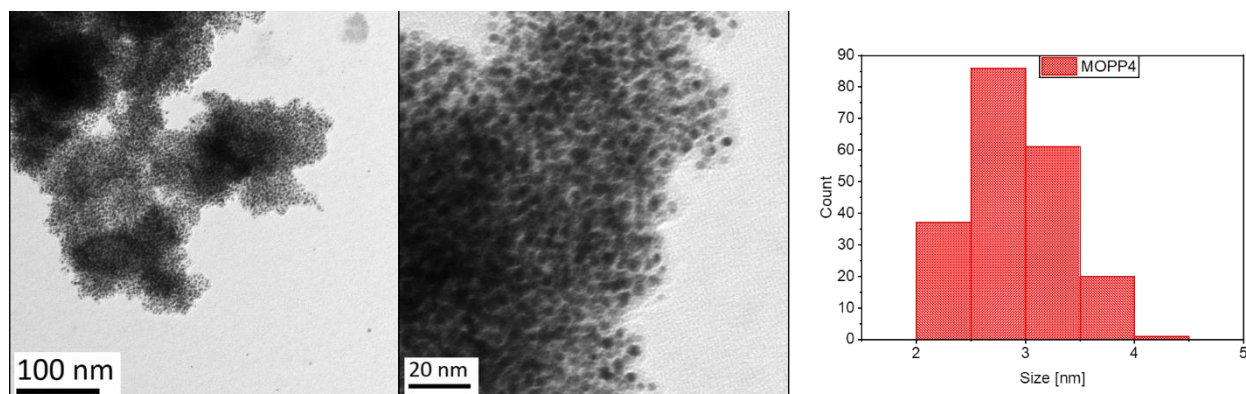

**Figure S23.** TEM-images and particle-size histogram of sample MOPP4. At least 200 particles were analyzed.



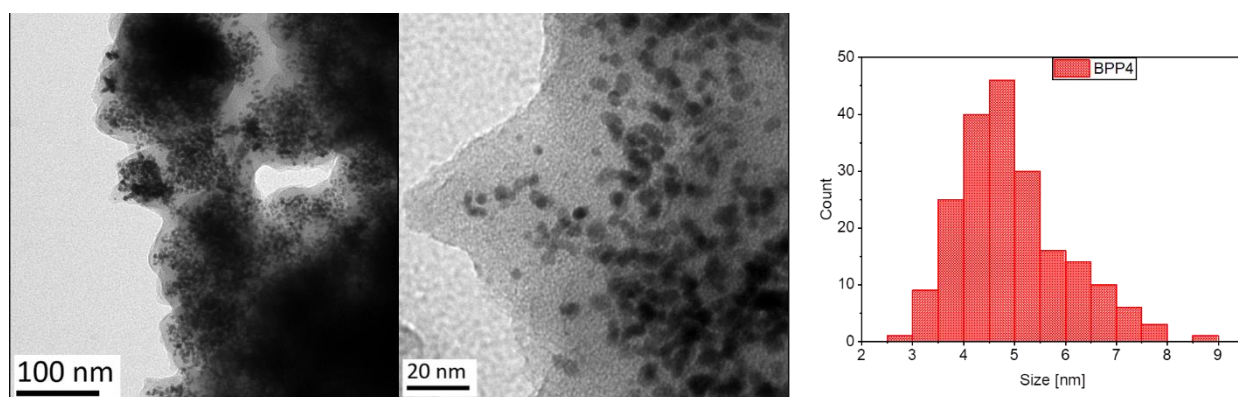

**Figure S24.** TEM-images and particle-size histogram of sample BPP4. At least 200 particles were analyzed.

#### Images of (EG/TAAIL)Pt-NPs

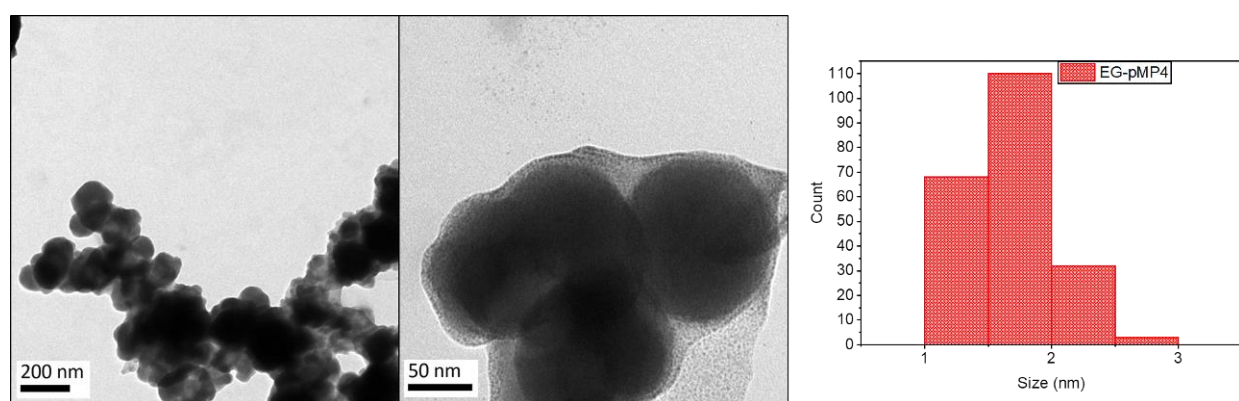

**Figure S25.** TEM-images and particle-size histogram of sample EG-pMP4. At least 200 particles were analyzed.

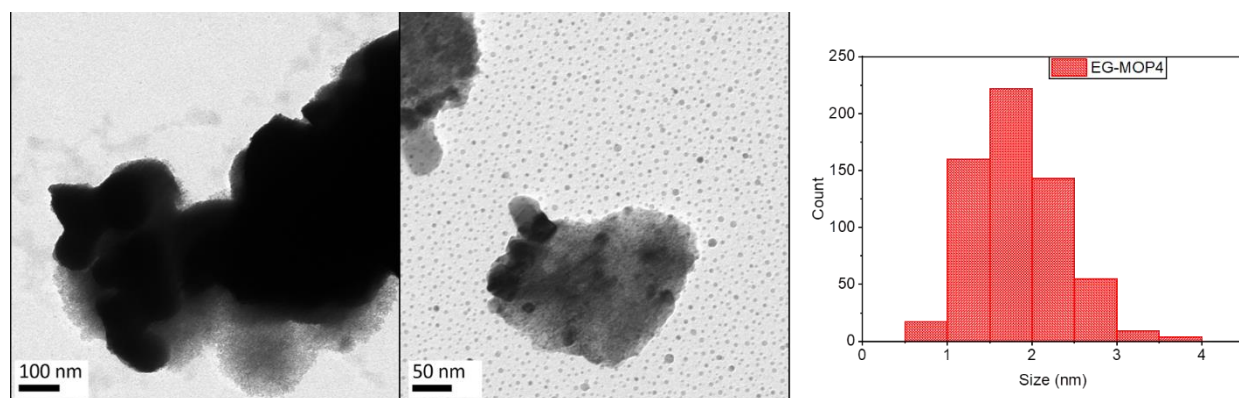

**Figure S26.** TEM-images and particle-size histogram of sample EG-MOP4. At least 200 particles were analyzed.

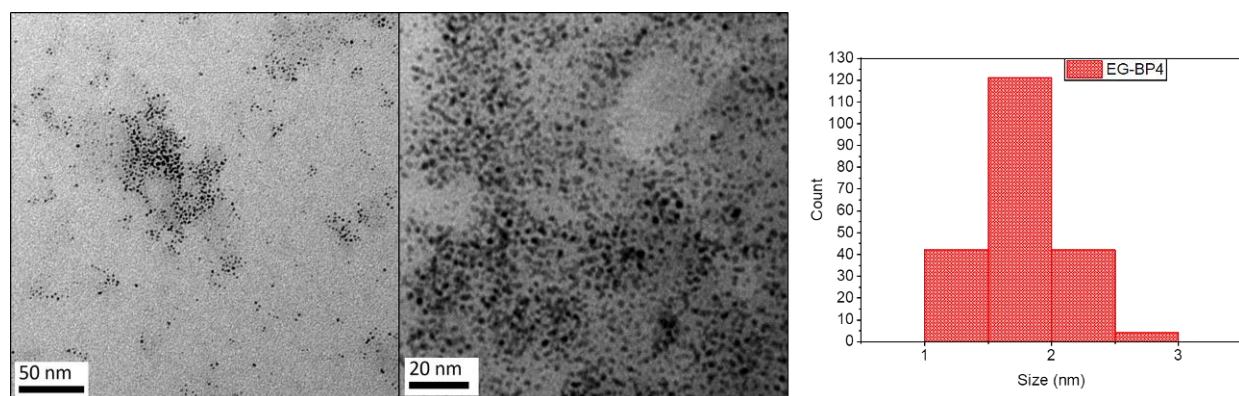

**Figure S27.** TEM-images and particle-size histogram of sample EG-BP4. At least 200 particles were analyzed.

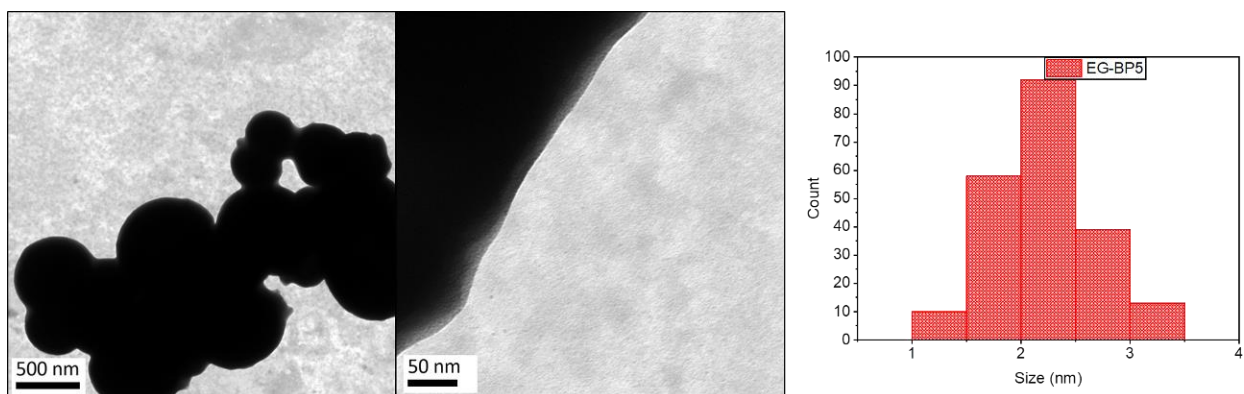

**Figure S28.** TEM-images and particle-size histogram of sample EG-BP5. At least 200 particles were analyzed.

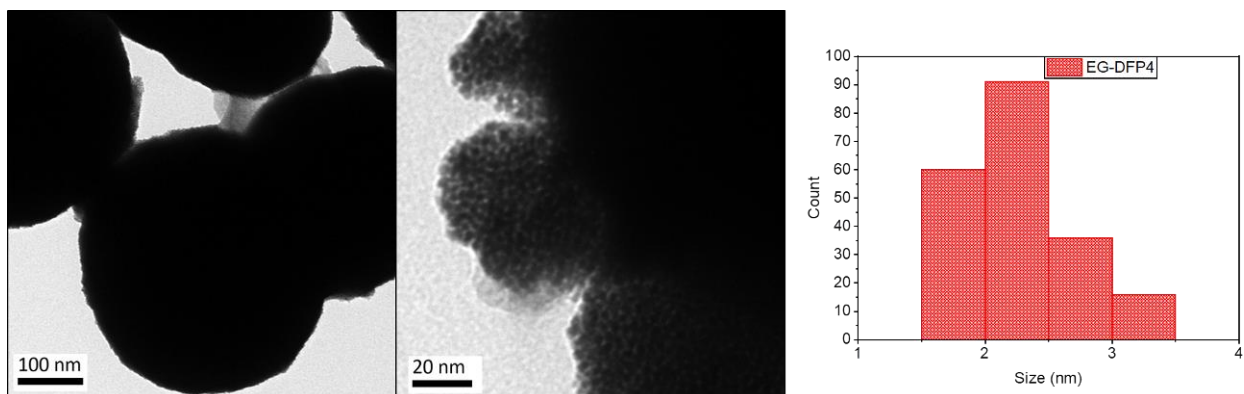

**Figure S29.** TEM-images and particle-size histogram of sample EG-DFP4. At least 200 particles were analyzed.

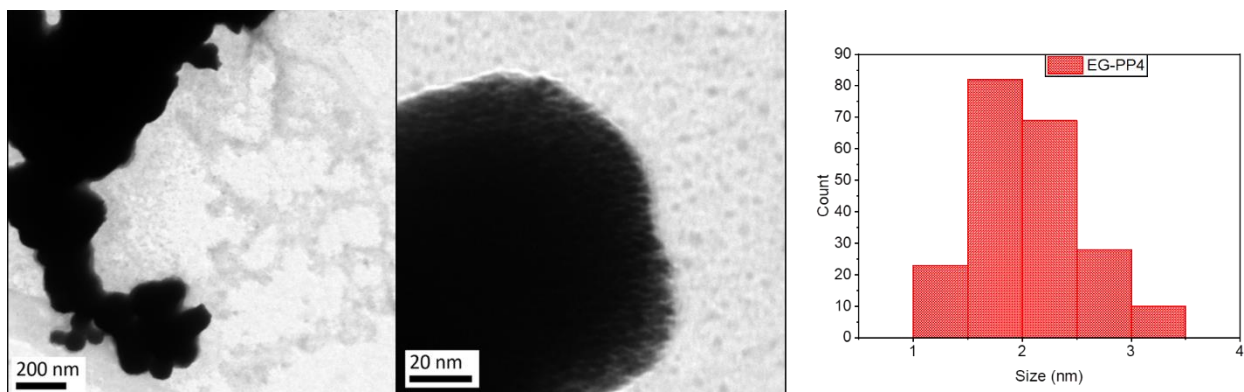

**Figure S30.** TEM-images and particle-size histogram of sample EG-PP4. At least 200 particles were analyzed.

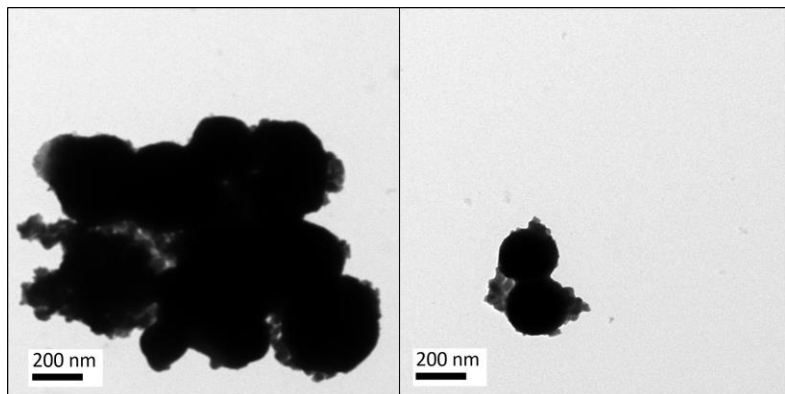

**Figure S31.** TEM-images of sample EG-MPP4. The quality of the particles was too low to determine the particle sizes.



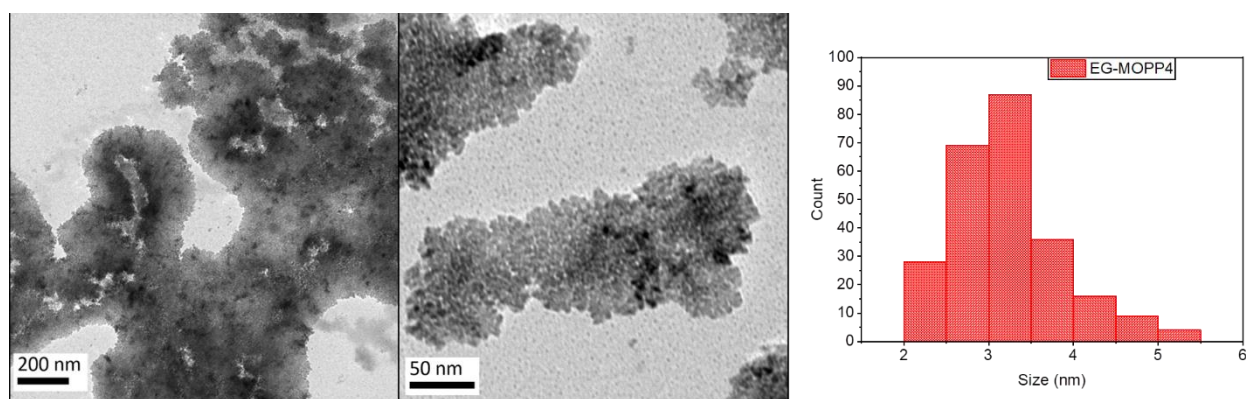

**Figure S32.** TEM-images and particle-size histogram of sample EG-MOPP4. At least 200 particles were analyzed.

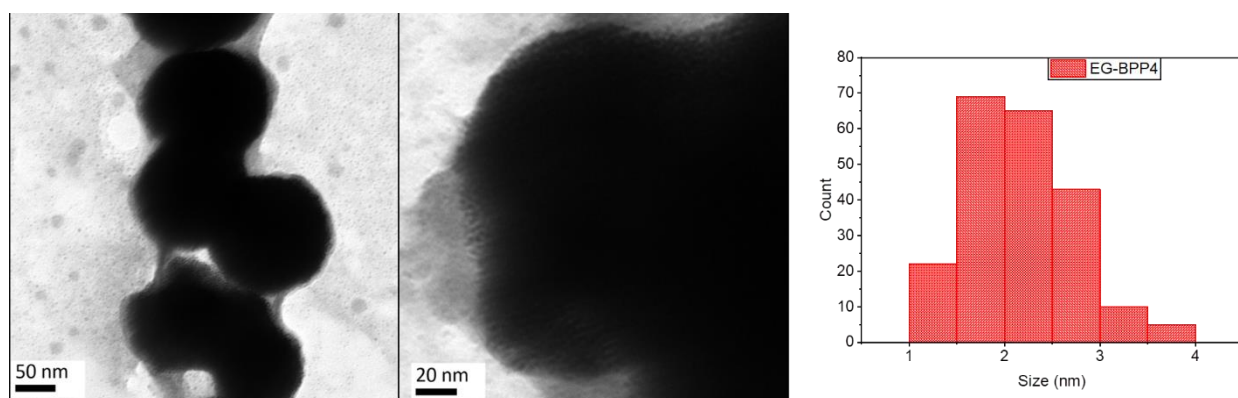

**Figure S33.** TEM-images and particle-size histogram of sample EG-BPP4. At least 200 particles were analyzed.

#### S4 Additional electrochemical measurements

Among the (TAAIL)Pt-NP samples, pMP4 shows a low Tafel slope of  $24 \text{ mV dec}^{-1}$ , despite its high overpotential, and matches Pt/C with  $25 \text{ mV dec}^{-1}$ . MOPP4 and BPP4 exhibit much higher Tafel slopes of  $54 \text{ mV dec}^{-1}$  and  $81 \text{ mV dec}^{-1}$ , respectively.

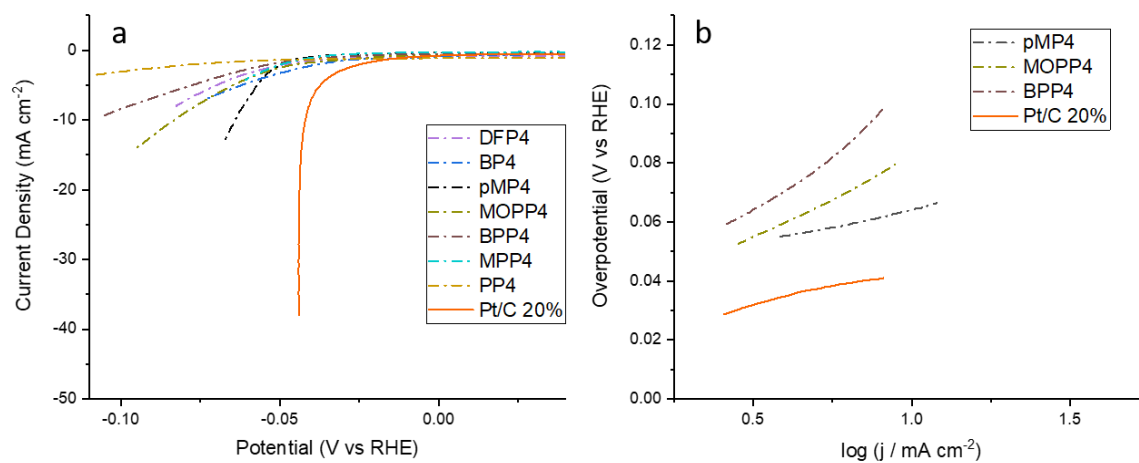

**Figure S34.** HER polarization curves of (TAAIL)Pt-NPs (a) and Tafel plots of samples that reached an overpotential of  $10 \text{ mA cm}^{-2}$  under the measurement conditions.

## S5 Hydrosilylation conversion and product analysis

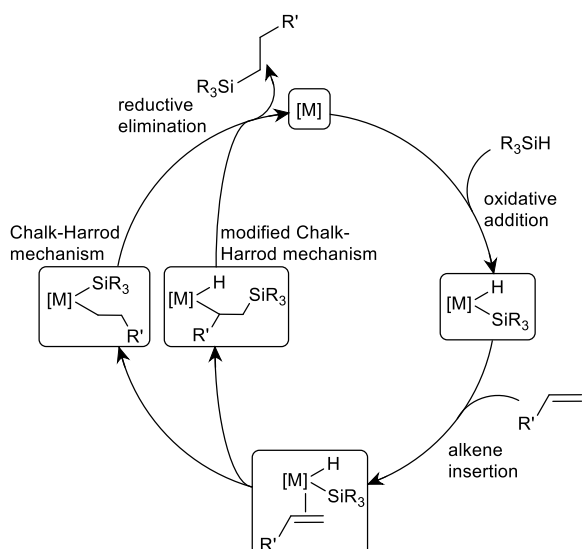

**Figure S35.** Chalk-Harrod mechanism and a modified Chalk-Harrod mechanism for the transition metal catalysed hydrosilylation of alkenes [3,4]. Reproduced from our previous work [5, Supplementary Materials].

### S5.1 Reaction procedure and catalytic activity

Most reactions presented follow the catalysis methods 1 to 3 described in the main text. The reactions serving as references can deviate from these methods as follows:

*Method 1: EG/[Ph<sub>4</sub>-BrImC<sub>4</sub>][NTf<sub>2</sub>], EG/[Ph<sub>4</sub>-BrImPhC<sub>4</sub>][NTf<sub>2</sub>] but with no K<sub>2</sub>PtCl<sub>6</sub>*

These reactions have been carried out similar to method 1 without Pt catalyst. 900 mg EG and 100 mg IL and the same amount of educts as mentioned in method 1 have been used for both reactions.

*Method 1: ([Ph<sub>2</sub>-MeImPhC<sub>4</sub>][NTf<sub>2</sub>])K<sub>2</sub>PtCl<sub>6</sub>, ([Ph<sub>4</sub>-OMeImPhC<sub>4</sub>][NTf<sub>2</sub>])K<sub>2</sub>PtCl<sub>6</sub>, [Ph<sub>4</sub>-OMeImPhC<sub>4</sub>][NTf<sub>2</sub>])MeCpPtMe<sub>3</sub> but with no EG*

These reactions have been carried out similar to method 1. Instead of EG-IL mixtures, only IL has been used to achieve ~0.2 wt% Pt in IL.

*Method 1: K<sub>2</sub>PtCl<sub>6</sub> but with no EG and no IL*

The reaction has been carried out as one-phase reaction (without EG and IL) neat under the same conditions as mentioned for method 1.

*Method 2: MOPP4, BPP4, Pt-NPs but with no EG*

These reactions have been carried out as mentioned in method 2 with the respective Pt catalyst.

*Method 3: Pt-free, K<sub>2</sub>PtCl<sub>6</sub>, MeCpPtMe<sub>3</sub>, Pt-NP but with no EG and no IL*

These reactions have been carried out as mentioned in method 3 with the respective Pt catalyst. For the Pt-free sample, the pure educts without any catalyst have been reacted neat.

**Table S5.** Activity of (IL)Pt-NP samples in the hydrosilylation of phenylacetylene with triethylsilane.

| Sample                                                                                            | Molar ratio<br>substrate/Pt <sup>1</sup> | Conversion<br>(%) <sup>2</sup> | Molar ratio<br>distal/proximal<br>from NMR <sup>2,3</sup> | Molar ratio<br>distal/proximal<br>from GC <sup>4</sup> |
|---------------------------------------------------------------------------------------------------|------------------------------------------|--------------------------------|-----------------------------------------------------------|--------------------------------------------------------|
| <b>Method 1 <sup>5</sup></b>                                                                      |                                          |                                |                                                           |                                                        |
| (EG/[Ph <sub>4</sub> -MeImC <sub>4</sub> ][NTf <sub>2</sub> ])K <sub>2</sub> PtCl <sub>6</sub>    | 8790                                     | 77                             | 3.5                                                       | 2.9                                                    |
| (EG/[Ph <sub>4</sub> -OMeImC <sub>4</sub> ][NTf <sub>2</sub> ])K <sub>2</sub> PtCl <sub>6</sub>   | 8300                                     | 77                             | 3.4                                                       | 3.3                                                    |
| (EG/[Ph <sub>4</sub> -BrImC <sub>4</sub> ][NTf <sub>2</sub> ])K <sub>2</sub> PtCl <sub>6</sub>    | 9620                                     | 96                             | 3.1                                                       | 2.4                                                    |
| (EG/[Ph <sub>4</sub> -BrImC <sub>5</sub> ][NTf <sub>2</sub> ])K <sub>2</sub> PtCl <sub>6</sub>    | 9620                                     | 96                             | 2.5                                                       | 2.1                                                    |
| (EG/[Ph <sub>2,4</sub> -FImC <sub>4</sub> ][NTf <sub>2</sub> ])K <sub>2</sub> PtCl <sub>6</sub>   | 9190                                     | 89                             | 3.5                                                       | 2.9                                                    |
| (EG/[PhImPhC <sub>4</sub> ][NTf <sub>2</sub> ])K <sub>2</sub> PtCl <sub>6</sub>                   | 9940                                     | 99                             | 3.0                                                       | 2.3                                                    |
| (EG/[Ph <sub>2</sub> -MeImPhC <sub>4</sub> ][NTf <sub>2</sub> ])K <sub>2</sub> PtCl <sub>6</sub>  | 10100                                    | >99                            | 3.1                                                       | 2.4                                                    |
| (EG/[Ph <sub>4</sub> -OMeImPhC <sub>4</sub> ][NTf <sub>2</sub> ])K <sub>2</sub> PtCl <sub>6</sub> | 8300                                     | 98                             | 3.5                                                       | 2.8                                                    |
| (EG/[Ph <sub>4</sub> -BrImPhC <sub>4</sub> ][NTf <sub>2</sub> ])K <sub>2</sub> PtCl <sub>6</sub>  | 8790                                     | >99                            | 2.2                                                       | 1.8                                                    |
| EG/[Ph <sub>4</sub> -BrImC <sub>4</sub> ][NTf <sub>2</sub> ]                                      | -                                        | 0                              | -                                                         | -                                                      |
| EG/[Ph <sub>4</sub> -BrImPhC <sub>4</sub> ][NTf <sub>2</sub> ]                                    | -                                        | 0                              | -                                                         | -                                                      |
| ([Ph <sub>2</sub> -MeImPhC <sub>4</sub> ][NTf <sub>2</sub> ])K <sub>2</sub> PtCl <sub>6</sub>     | 9500                                     | 0                              | -                                                         | -                                                      |
| ([Ph <sub>4</sub> -OMeImPhC <sub>4</sub> ][NTf <sub>2</sub> ])                                    | 9100                                     | 0                              | -                                                         | -                                                      |
| ([Ph <sub>4</sub> -OMeImPhC <sub>4</sub> ][NTf <sub>2</sub> ])MeCpPtMe <sub>3</sub>               | 7900                                     | <5                             | -                                                         | -                                                      |
| (EG)K <sub>2</sub> PtCl <sub>6</sub>                                                              | 9660                                     | 50                             | 3.6                                                       | -                                                      |
| K <sub>2</sub> PtCl <sub>6</sub>                                                                  | 8820                                     | 0                              | -                                                         | -                                                      |
| <b>Method 2 <sup>6</sup></b>                                                                      |                                          |                                |                                                           |                                                        |
| EG-pMP4                                                                                           | 1110                                     | 5                              | -                                                         | -                                                      |
| EG-MOP4                                                                                           | 1090                                     | 29                             | 3.2                                                       | 2.5                                                    |
| EG-BP4                                                                                            | 1050                                     | 38                             | 3.6                                                       | 2.8                                                    |
| EG-BP5                                                                                            | 1050                                     | 8                              | -                                                         | -                                                      |
| EG-DFP4                                                                                           | 1070                                     | 7                              | -                                                         | -                                                      |
| EG-PP4                                                                                            | 980                                      | 57                             | 3.1                                                       | 1.7                                                    |
| EG-MPP4                                                                                           | 970                                      | 0                              | -                                                         | -                                                      |
| EG-MOPP4                                                                                          | 1060                                     | 0                              | -                                                         | -                                                      |
| EG-BPP4                                                                                           | 980                                      | 75                             | 3.4                                                       | 1.4                                                    |
| Pt-NP <sup>7</sup>                                                                                | 1010                                     | <5                             | -                                                         | -                                                      |
| MOPP4                                                                                             | 1070                                     | <5                             | -                                                         | -                                                      |
| BPP4                                                                                              | 1130                                     | <5                             | -                                                         | -                                                      |

### Method 3 <sup>8</sup>

#### 3a) (EG/TAAIL)Pt-NP

|                                  |      |     |     |     |
|----------------------------------|------|-----|-----|-----|
| EG-pMP4                          | 1000 | 99  | 2.4 | 2.1 |
| EG-BP4                           | 880  | >99 | 1.5 | 1.3 |
| EG-BP5                           | 980  | 67  | 2.2 | 1.9 |
| EG-DFP4                          | 920  | 57  | 2.8 | 2.7 |
| EG-PP4                           | 1040 | 46  | 2.8 | 2.5 |
| EG-MPP4                          | 950  | >99 | 2.0 | 1.5 |
| EG-MOPP4                         | 930  | >99 | 1.9 | 2.5 |
| EG-BPP4                          | 990  | 99  | 1.8 | 1.5 |
| Pt-free                          | -    | 0   | -   | -   |
| K <sub>2</sub> PtCl <sub>6</sub> | 1260 | 98  | 1.9 | 1.3 |
| Pt-NP <sup>6</sup>               | 1320 | 91  | 1.9 | 1.6 |

#### 3b) (TAAIL)Pt-NP

|                       |      |     |     |     |
|-----------------------|------|-----|-----|-----|
| pMP4                  | 950  | >99 | 2.2 | 2.2 |
| MOP4                  | 840  | 99  | 1.8 | 1.1 |
| BP4                   | 1030 | 82  | 2.6 | 2.3 |
| BP5                   | 1140 | 95  | 2.2 | 1.7 |
| DFP4                  | 1030 | 99  | 2.2 | 1.9 |
| PP4                   | 880  | 99  | 1.5 | 1.0 |
| MPP4                  | 990  | >99 | 2.0 | 1.5 |
| MOPP4                 | 1010 | 98  | 1.7 | 1.5 |
| BPP4                  | 1220 | 30  | 3.4 | 2.8 |
| MeCpPtMe <sub>3</sub> | 7660 | >99 | 2.4 | 1.7 |

<sup>1</sup> Molar ratio of the substrate phenylacetylene to Pt content, with a molar ratio of 1.0 of triethylsilane to phenylacetylene for all reactions. Pt-contents of K<sub>2</sub>PtCl<sub>6</sub>·6H<sub>2</sub>O, MeCpPtMe<sub>3</sub> and Pt-NP were calculated in correlation to the molar weight and assuming quantitative conversion to Pt-NPs. <sup>2</sup> The statistical error of the distal/proximal product ratio and substrate conversion determined by signal intensities in <sup>1</sup>H NMR is roughly 5%. <sup>3</sup> Determined by <sup>1</sup>H-NMR spectra from the product solution. Reference signals for the distal and proximal product were taken from the literature [6]. Due to a high noise/signal ratio, values are only calculated if at least 10% product yield could be achieved. <sup>4</sup> Determined from peak areas. Due to a high noise/signal ratio, values are only calculated if at least 10% product yield could be achieved. <sup>5</sup> Substrate/EG-IL (9/1 EG/IL ratio) two-phase reactions, time 15 min, microwave induced heating at 30 W, temperature 110 °C and catalysts dispersed in EG-IL mixtures. 12.5 mmol phenylacetylene and triethylsilane and 0.61-0.73 mg catalyst were used. <sup>6</sup> One-phase reactions, time 15 min, microwave induced heating at 200 W, temperature 110 °C and Pt-NPs as catalysts. 4.9 mmol phenylacetylene and triethylsilane and 0.88-1.01 mg catalyst were used. <sup>7</sup> Reference Pt-NPs were obtained in the IL [BMIm][NTf<sub>2</sub>] after a method already described by us [7]. <sup>8</sup> One-phase reactions, time 5 min, microwave induced heating at 200 W, temperature 200 °C and Pt-NP as catalysts. 4.9 mmol phenylacetylene and triethylsilane and 0.80-1.17 mg catalyst have been used. As exception, 12.5 mmol phenylacetylene and triethylsilane and 0.52 mg catalyst have been used for MeCpPtMe<sub>3</sub>.

The catalyst stability for the hydrosilylation reaction was examined by reusing the Pt catalysts of each method additional times. The catalyst recycling and re-use is described in the main text, Section 3.4. Unfortunately, all catalyst recycling experiments resulted in large losses of conversion after three consecutive catalysis runs, reaching only up to 20 % of the initial conversion value and most catalyst samples do not show any conversion at all anymore at the first recycling run.

## S5.2 NMR analysis

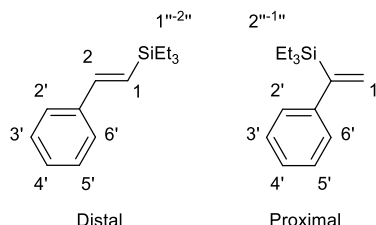

The following NMR values and figures were obtained from the hydrosilylation catalysis with (EG/[Ph<sub>2</sub>-MeImPhC<sub>4</sub>][NTf<sub>2</sub>])K<sub>2</sub>PtCl<sub>6</sub> method 1 and are shown exemplarily for all experiments. The peaks can be slightly altered for other reactions.

### Distal:

<sup>1</sup>H NMR (300 MHz, CDCl<sub>3</sub>): δ 7.02 - 7.40 (m, 5H, 2'-6'-H<sub>5</sub>), 6.82 (d, 1H, <sup>3</sup>J = 19.3 Hz, 2-H), 6.34 (d, 1H, <sup>3</sup>J = 19.3 Hz, 1-H), 0.80 - 0.96 (m, 9H, 3-2''-H<sub>3</sub>), 0.52 - 0.65 (m, 6H, 3-1''-H<sub>2</sub>).

<sup>13</sup>C NMR (75 MHz, CDCl<sub>3</sub>): δ 145.0, 138.7, 128.6, 128.0, 126.5, 126.0, 7.6, 3.7.

### Proximal:

<sup>1</sup>H NMR (300 MHz, CDCl<sub>3</sub>): δ 7.02 - 7.40 (m, 5H, 2'-6'-H<sub>5</sub>), 5.79 (d, 1H, <sup>3</sup>J = 3.1 Hz, 1-H)\*, 5.49 (d, 1H, <sup>3</sup>J = 3.1 Hz, 1-H)\*, 0.80 - 0.96 (m, 9H, 3-2''-H<sub>3</sub>), 0.52 - 0.65 (m, 6H, 3-1''-H<sub>2</sub>); \*signal assignment interchangeable [8].

<sup>13</sup>C NMR (75 MHz, CDCl<sub>3</sub>): δ 150.6, 145.6, 128.9, 128.2, 126.8, 126.2, 7.4, 3.5.

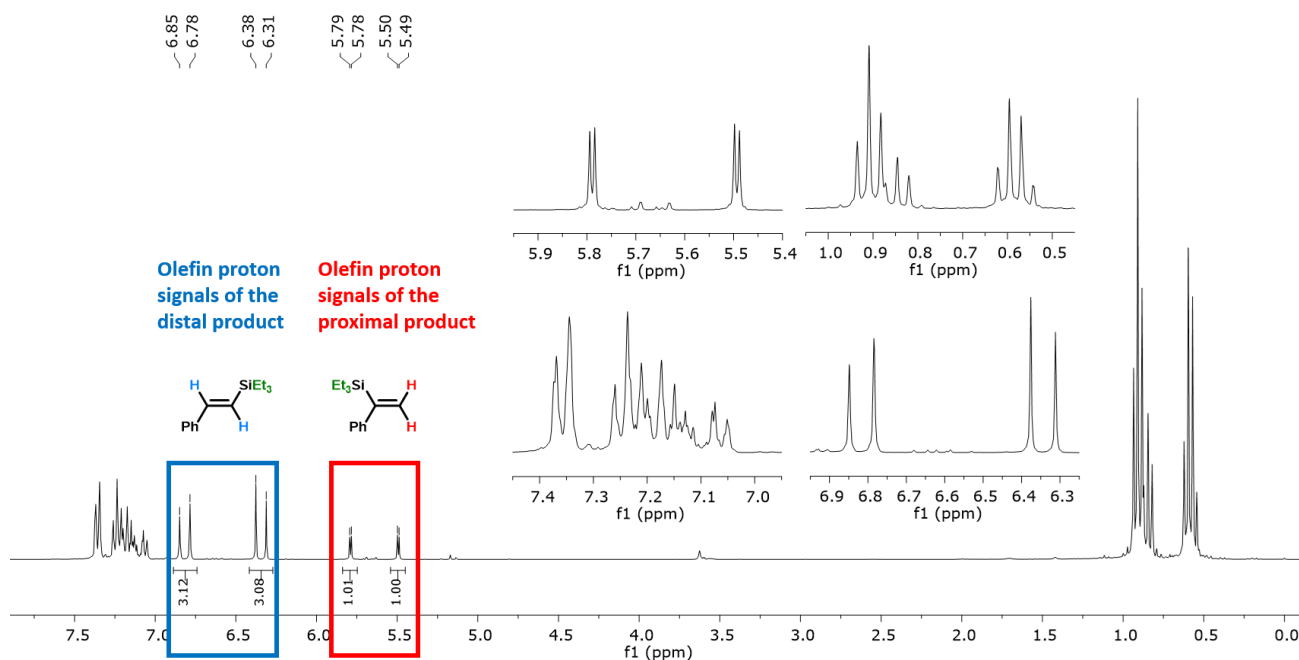

**Figure S36.** <sup>1</sup>H NMR spectrum (300 MHz, CDCl<sub>3</sub>) with expanded sections of the hydrosilylation product from sample (EG/[Ph<sub>2</sub>-MeImPhC<sub>4</sub>][NTf<sub>2</sub>])K<sub>2</sub>PtCl<sub>6</sub> with method 1. The conversion was 99% and the molar distal/proximal ratio 3.1.

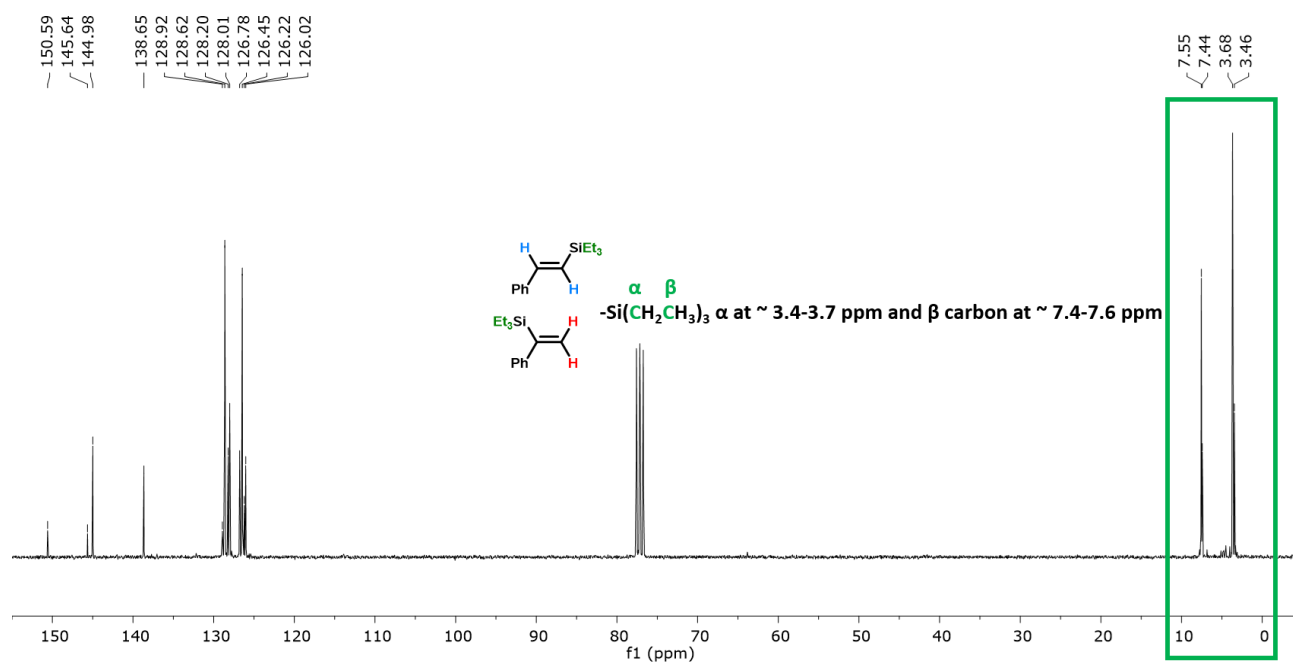

**Figure S37.**  $^{13}\text{C}$  NMR spectrum (75 MHz,  $\text{CDCl}_3$ ) of the hydrosilylation product from sample (EG/[ $\text{Ph}_2\text{-MeImPhC}_4$ ][ $\text{NTf}_2$ ]) $\text{K}_2\text{PtCl}_6$  with method 1. Carbon  $\alpha$  at ~3.4-3.7 ppm and carbon  $\beta$  at ~7.4-7.6 ppm. The two peaks each for  $\alpha$  and  $\beta$  are due to the distal and proximal products.

### S5.3 Atomic absorption spectrometry (AAS)

**Table S6.** Pt atomic absorption spectrometry (AAS) of product solutions after catalysis.

| Sample                                                                               | Pt detected<br>( $\text{mg L}^{-1}$ ) <sup>1</sup> | Sample                            | Pt detected ( $\text{mg L}^{-1}$ ) <sup>1</sup> |
|--------------------------------------------------------------------------------------|----------------------------------------------------|-----------------------------------|-------------------------------------------------|
| <b>Method 1</b> <sup>2</sup>                                                         |                                                    | <b>Method 2</b> <sup>3</sup>      |                                                 |
| (EG/[ $\text{Ph}_4\text{-MeImC}_4$ ][ $\text{NTf}_2$ ]) $\text{K}_2\text{PtCl}_6$    | 20                                                 | EG-BP4                            | 28                                              |
| (EG/[ $\text{Ph}_4\text{-OMeImC}_4$ ][ $\text{NTf}_2$ ]) $\text{K}_2\text{PtCl}_6$   | 24                                                 | EG-BPP4                           | 13                                              |
| (EG/[ $\text{Ph}_4\text{-BrImC}_4$ ][ $\text{NTf}_2$ ]) $\text{K}_2\text{PtCl}_6$    | 26                                                 | <b>Method 3</b> <sup>4</sup>      |                                                 |
| (EG/[ $\text{Ph}_4\text{-BrImC}_5$ ][ $\text{NTf}_2$ ]) $\text{K}_2\text{PtCl}_6$    | 8                                                  | <i>3a</i> (EG/TAAIL) <i>Pt-NP</i> |                                                 |
| (EG/[ $\text{Ph}_{2,4}\text{-FImC}_4$ ][ $\text{NTf}_2$ ]) $\text{K}_2\text{PtCl}_6$ | 12                                                 | EG-BP4                            | 80                                              |
| (EG/[ $\text{PhImPhC}_4$ ][ $\text{NTf}_2$ ]) $\text{K}_2\text{PtCl}_6$              | 5                                                  | EG-BPP4                           | 51                                              |
| (EG/[ $\text{Ph}_2\text{-MeImPhC}_4$ ][ $\text{NTf}_2$ ]) $\text{K}_2\text{PtCl}_6$  | 13                                                 | <i>3b</i> (TAAIL) <i>Pt-NP</i>    |                                                 |
| (EG/[ $\text{Ph}_4\text{-OMeImPhC}_4$ ][ $\text{NTf}_2$ ]) $\text{K}_2\text{PtCl}_6$ | 13                                                 | BP4                               | 1.4                                             |
| (EG/[ $\text{Ph}_4\text{-BrImPhC}_4$ ][ $\text{NTf}_2$ ]) $\text{K}_2\text{PtCl}_6$  | 2.0                                                | BPP4                              | 1.0                                             |

<sup>1</sup> Pt amount detected in 0.2 mL of product solution. The obtained values can deviate within a range of  $\pm 10\%$ . <sup>2</sup> Substrate/EG-IL (9/1 EG/IL ratio) two-phase reactions, time 15 min, microwave induced heating at 30 W, temperature 110 °C and catalysts dispersed in EG-IL mixtures. 12.5 mmol phenylacetylene and triethylsilane and 0.61-0.73 mg catalyst were used. <sup>3</sup> One-phase reactions, time 15 min, microwave induced heating at 200 W, temperature 110 °C and *Pt-NP* as catalysts. 4.9 mmol phenylacetylene and triethylsilane and 0.88-1.01 mg catalyst were used. <sup>4</sup> One-phase reactions, time 5 min, microwave induced heating at 200 W, temperature 200 °C and *Pt-NP* as catalysts. 4.9 mmol phenylacetylene and triethylsilane and 0.80-1.17 mg catalyst were used.



## S5.4 Gas chromatography (GC) analysis

**Table S7.** Gas chromatography (GC) of product solutions after catalysis. Only samples with at least 10 % product yield are presented.

| Sample                                                                                             | Retention time (min) |                  |                        | Sample                           | Retention time (min) |                  |                        |
|----------------------------------------------------------------------------------------------------|----------------------|------------------|------------------------|----------------------------------|----------------------|------------------|------------------------|
|                                                                                                    | distal product       | proximal product | d/p ratio <sup>1</sup> |                                  | distal product       | proximal product | d/p ratio <sup>1</sup> |
| <b>Method 1 <sup>2</sup></b>                                                                       |                      |                  |                        | <b>Method 3 <sup>4</sup></b>     |                      |                  |                        |
| (EG/[Ph <sub>4</sub> -MeImC <sub>4</sub> ][NTf <sub>2</sub> ])-K <sub>2</sub> PtCl <sub>6</sub>    | 7.29                 | 6.54             | 2.9                    | 3a) (EG/TAAIL)Pt-NPs             |                      |                  |                        |
| (EG/[Ph <sub>4</sub> -OMeImC <sub>4</sub> ][NTf <sub>2</sub> ])-K <sub>2</sub> PtCl <sub>6</sub>   | 7.26                 | 6.53             | 3.3                    | EG-pMP4                          | 7.27                 | 6.54             | 2.1                    |
| (EG/[Ph <sub>4</sub> -BrImC <sub>4</sub> ][NTf <sub>2</sub> ])-K <sub>2</sub> PtCl <sub>6</sub>    | 7.28                 | 6.54             | 2.4                    | EG-BP4                           | 7.28                 | 6.55             | 1.3                    |
| (EG/[Ph <sub>4</sub> -BrImC <sub>5</sub> ][NTf <sub>2</sub> ])-K <sub>2</sub> PtCl <sub>6</sub>    | 7.26                 | 6.54             | 2.1                    | EG-BP5                           | 7.26                 | 6.52             | 1.9                    |
| (EG/[Ph <sub>2,4</sub> -FImC <sub>4</sub> ][NTf <sub>2</sub> ])-K <sub>2</sub> PtCl <sub>6</sub>   | 7.25                 | 6.52             | 2.9                    | EG-DFP4                          | 7.25                 | 6.52             | 2.7                    |
| (EG/[PhImPhC <sub>4</sub> ][NTf <sub>2</sub> ])-K <sub>2</sub> PtCl <sub>6</sub>                   | 7.28                 | 6.54             | 2.3                    | EG-PP4                           | 7.26                 | 6.52             | 2.5                    |
| (EG/[Ph <sub>2</sub> -MeImPhC <sub>4</sub> ][NTf <sub>2</sub> ])-K <sub>2</sub> PtCl <sub>6</sub>  | 7.28                 | 6.52             | 2.4                    | EG-MPP4                          | 7.27                 | 6.54             | 1.5                    |
| (EG/[Ph <sub>4</sub> -OMeImPhC <sub>4</sub> ][NTf <sub>2</sub> ])-K <sub>2</sub> PtCl <sub>6</sub> | 7.28                 | 6.54             | 2.8                    | EG-MOPP4                         | 7.25                 | 6.52             | 2.5                    |
| (EG/[Ph <sub>4</sub> -BrImPhC <sub>4</sub> ][NTf <sub>2</sub> ])-K <sub>2</sub> PtCl <sub>6</sub>  | 7.28                 | 6.54             | 1.8                    | EG-BPP4                          | 7.26                 | 6.54             | 1.5                    |
| <b>Method 2 <sup>3</sup></b>                                                                       |                      |                  |                        | K <sub>2</sub> PtCl <sub>6</sub> | 7.32                 | 6.58             | 1.3                    |
| EG-pMP4                                                                                            | 7.24                 | 6.53             | 3.6                    | Pt-NP <sup>5</sup>               | 7.26                 | 6.54             | 1.6                    |
| EG-MOP4                                                                                            | 7.28                 | 6.54             | 2.5                    | 3b) (TAAIL)Pt-NPs                |                      |                  |                        |
| EG-BP4                                                                                             | 7.26                 | 6.52             | 2.8                    | pMP4                             | 7.28                 | 6.54             | 2.2                    |
| EG-BP5                                                                                             | 7.24                 | 6.51             | 3.4                    | MOP4                             | 7.27                 | 6.54             | 1.1                    |
| EG-DFP4                                                                                            | 7.24                 | 6.51             | 3.4                    | BP4                              | 7.25                 | 6.52             | 2.3                    |
| EG-PP4                                                                                             | 7.30                 | 6.55             | 1.7                    | BP5                              | 7.28                 | 6.54             | 1.7                    |
| EG-MOPP4                                                                                           | 7.24                 | 6.51             | 1.6                    | DFP4                             | 7.28                 | 6.54             | 1.9                    |
| EG-BPP4                                                                                            | 7.31                 | 6.56             | 1.4                    | PP4                              | 7.25                 | 6.54             | 1.0                    |
|                                                                                                    |                      |                  |                        | MPP4                             | 7.27                 | 6.54             | 1.5                    |
|                                                                                                    |                      |                  |                        | MOPP4                            | 7.25                 | 6.54             | 1.5                    |
|                                                                                                    |                      |                  |                        | BPP4                             | 7.25                 | 6.53             | 2.8                    |
|                                                                                                    |                      |                  |                        | MeCpPtMe <sub>3</sub>            | 7.29                 | 6.55             | 1.7                    |

<sup>1</sup> Determined from peak areas. The statistical error of the distal/proximal product ratio determined by signal intensities in GC is roughly up to 10%. <sup>2</sup> Substrate/EG-IL (9/1 EG/IL ratio) two-phase reactions, time 15 min, microwave induced heating at 30 W, temperature 110 °C and catalysts dispersed in EG-IL mixtures. 12.5 mmol phenylacetylene and triethylsilane and 0.61-0.73 mg catalyst were used. <sup>3</sup> One-phase reactions, time 15 min, microwave induced heating at 200 W, temperature 110 °C and Pt-NP as catalysts. 4.9 mmol phenylacetylene and triethylsilane and 0.88-1.01 mg catalyst were used. <sup>4</sup> One-phase reactions, time 5 min, microwave induced heating at 200 W, temperature 200 °C and Pt-NP as catalysts. 4.9 mmol phenylacetylene and triethylsilane and 0.80-1.17 mg catalyst were used. <sup>5</sup> Reference Pt-NP have been obtained in the IL [BMIm][NTf<sub>2</sub>] after a method already described by us [7].

The following figure was obtained from the hydrosilylation catalysis with (EG/[Ph<sub>2</sub>-MeImPhC<sub>4</sub>][NTf<sub>2</sub>])K<sub>2</sub>PtCl<sub>6</sub> method 1 and is shown exemplarily for all experiments. The peaks can be slightly altered for other reactions.

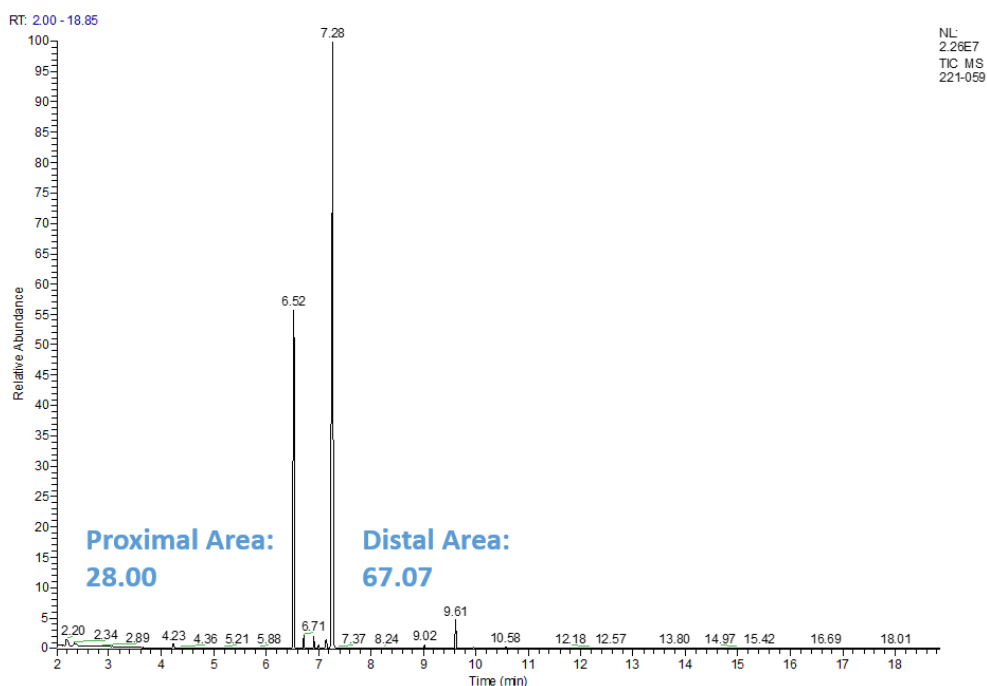

**Figure S38.** Gas chromatogram of the hydrosilylation product from sample (EG/[Ph<sub>2</sub>-MeImPhC<sub>4</sub>][NTf<sub>2</sub>])K<sub>2</sub>PtCl<sub>6</sub> with method 1. The molar distal/proximal ratio was 2.4.

#### S5.5 TEM-images after catalysis

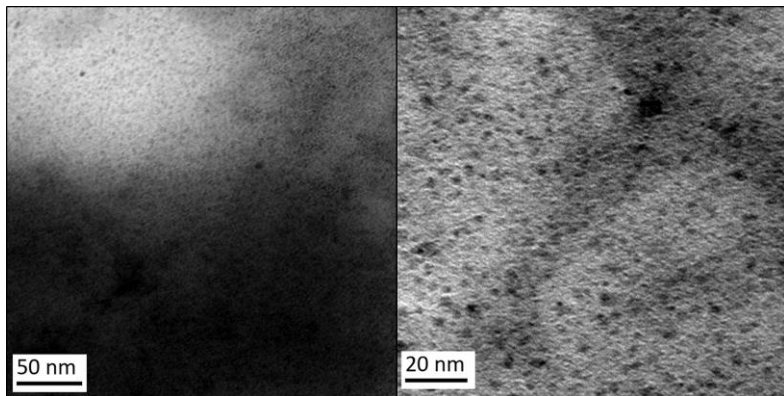

**Figure S39.** TEM images of sample (EG/[Ph<sub>2</sub>-MeImPhC<sub>4</sub>][NTf<sub>2</sub>])-K<sub>2</sub>PtCl<sub>6</sub> after the hydrosilylation reaction according to method 1.

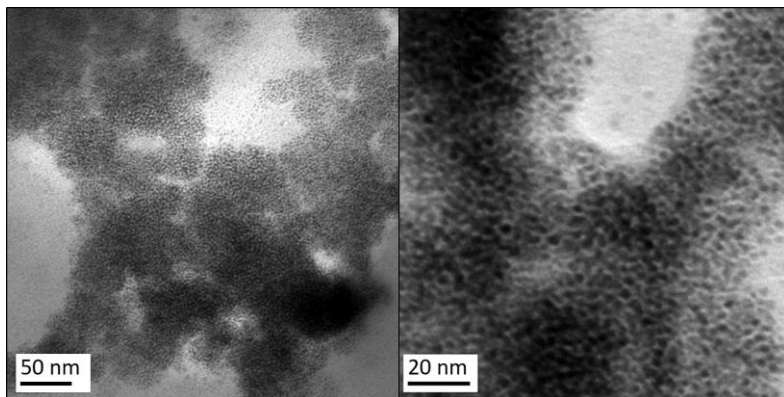

**Figure S40.** TEM images of sample (EG/[Ph<sub>4</sub>-BrImPhC<sub>4</sub>][NTf<sub>2</sub>])-K<sub>2</sub>PtCl<sub>6</sub> after the hydrosilylation reaction according to method 1.

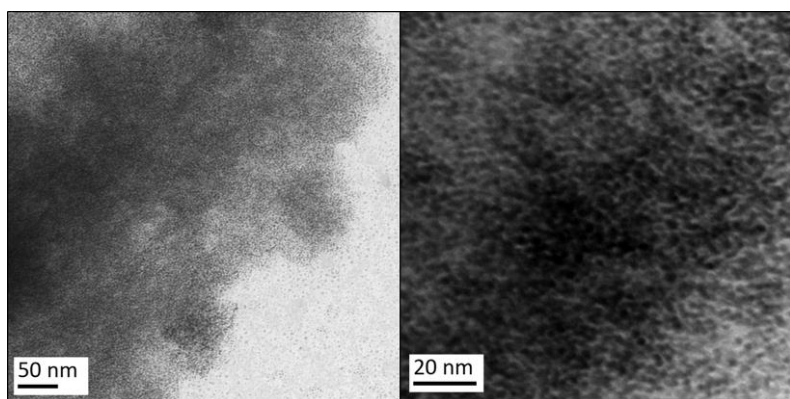

**Figure S41.** TEM images of sample EG-BPP4 after the hydrosilylation reaction according to method 2.

## References

1. Lerch, S.; Strassner, T. Synthesis and Physical Properties of Tunable Aryl Alkyl Ionic Liquids (TAAILs). *Chem. Eur. J.* **2021**, *27*, 15554–15557. <https://doi.org/10.1002/chem.202102545>.
2. Biller, H.; Strassner, T. Synthesis and Physical Properties of Tunable Aryl Alkyl Ionic Liquids (TAAILs) Comprising Imidazolium Cations Blocked with Methyl-, Propyl- and Phenyl-Groups at the C2 Position. *Chem. Eur. J.* **2022**, e202202795. <https://doi.org/10.1002/chem.202202795>
3. Troegel, D.; Stohrer, J. Recent advances and actual challenges in late transition metal catalyzed hydrosilylation of olefins from an industrial point of view. *Coord. Chem. Rev.* **2011**, *255*, 1440–1459. <https://doi.org/10.1016/j.ccr.2010.12.025>.
4. Chalk, A. J.; Harrod, J. F. Homogeneous Catalysis. II. The Mechanism of the Hydrosilation of Olefins Catalyzed by Group VIII Metal Complexes 1. *J. Am. Chem. Soc.* **1965**, *87*, 16–21. <https://doi.org/10.1021/ja01079a004>.
5. Woitassek, D.; Moya-Cancino, J. G.; Sun, Y.; Song, Y.; Woschko, D.; Roitsch, S.; Janiak, C. Sweet, Sugar-Coated Hierarchical Platinum Nanostructures for Easy Support, Heterogenization and Separation. *Chemistry* **2022**, *4*, 1147–1160. <https://doi.org/10.3390/chemistry4040078>.
6. Yong, L.; Kirleis, K.; Butenschön, H. Stereodivergent Formation of Alkenylsilanes: syn or anti Hydrosilylation of Alkynes Catalyzed by a Cyclopentadienylcobalt(I) Chelate Bearing a Pendant Phosphane Tether. *Adv. Synth. Catal.* **2006**, *348*, 833–836. <https://doi.org/10.1002/adsc.200606028>.
7. Woitassek, D.; Lerch, S.; Jiang, W.; Shviro, M.; Roitsch, S.; Strassner, T.; Janiak, C. The Facile Deposition of Pt Nanoparticles on Reduced Graphite Oxide in Tunable Aryl Alkyl Ionic Liquids for ORR Catalysts. *Molecules* **2022**, *27*, 1018. <https://doi.org/10.3390/molecules27031018>.
8. Chauhan, M.; Hauck, B. J.; Keller, L. P.; Boudjouk, P. Hydrosilylation of alkynes catalyzed by platinum on carbon. *J. Organomet. Chem.* **2002**, *645*, 1–13. [https://doi.org/10.1016/S0022-328X\(01\)01103-2](https://doi.org/10.1016/S0022-328X(01)01103-2).
